# Supplementary material
Source: PubMed Central journal article supplement (PMC8855757)
Supplement: ccm-50-0491-s001.pdf [file ccm-50-0491-s001.pdf]

## SUPPLEMENTARY APPENDIX

### **Barotrauma in COVID-19 patients undergoing invasive mechanical ventilation: a systematic literature review**

A. Belletti, G. Todaro, G. Valsecchi, R. Losiggio, D. Palumbo, G. Landoni, A. Zangrillo

|                          |         |
|--------------------------|---------|
| PubMed search string     | page 2  |
| Supplementary Table 1    | page 3  |
| Supplementary Table 2    | page 4  |
| Supplementary Table 3    | page 5  |
| Supplementary Table 4    | page 6  |
| Supplementary Table 5    | page 7  |
| Supplementary Table 6    | page 8  |
| Supplementary Table 7    | page 9  |
| Supplementary Figure 1   | page 14 |
| Supplementary Figure 2   | page 15 |
| Supplementary Figure 3   | page 16 |
| Supplementary Figure 4   | page 17 |
| Supplementary Figure 5   | page 18 |
| Supplementary Figure 6   | page 19 |
| Supplementary Figure 7   | page 20 |
| Supplementary Figure 8   | page 21 |
| Supplementary Figure 9   | page 22 |
| Supplementary Figure 10  | page 23 |
| Supplementary References | page 24 |

## **Pubmed Search String**

((Sars-cov-2) or (covid19) or (coronavirus 19)) and ((subcutaneous emphysema) or (pneumomediastinum) or (pneumothorax) or (pneumatocele) or (barotrauma))

**Supplementary Table 1.** Details of major exclusions

| <b>First Author</b> | <b>Year</b> | <b>Journal</b>                           | <b>Reason for exclusion</b> |
|---------------------|-------------|------------------------------------------|-----------------------------|
| Gordo MLP           | 2020        | Radiologia                               | No event rate               |
| Diaz A              | 2020        | Heart Lung                               | No event rate               |
| Jia L               | 2020        | Zhonghua Wei Zhong<br>Bing Ji Jiu Yi Xue | No event rate               |
| Shrift D            | 2020        | J Ultrasound Med                         | No event rate               |
| Hameed M            | 2020        | Respir Med Case Rep                      | No event rate               |
| Bellini R           | 2020        | J Cardiothorac Surg                      | No event rate               |
| Urigo C             | 2020        | Radiol Case Rep                          | No event rate               |
| Marsico S           | 2020        | Arch Bronconeumol                        | No event rate               |
| Marsico S           | 2020        | Arch Bronconeumol                        | No event rate               |
| do Lago VC          | 2020        | Am J Med Sci                             | No event rate               |
| Volpi S             | 2020        | Eur J Cardiothorac<br>Surg               | No event rate               |
| Gorospe L           | 2020        | Arch Bronconeumol                        | No event rate               |
| Underner M          | 2020        | Rev Mal Respir                           | No event rate               |
| Büttner R           | 2020        | MMW Fortschr Med                         | No event rate               |
| Onigbinde SO        | 2020        | Biomed Res Int                           | Not COVID-19                |
| Çinkooğlu A         | 2020        | Diagn Interv Radiol                      | Not-ICU setting             |
| Murk W              | 2021        | CMAJ                                     | Not ICU setting             |
| Protti A            | 2021        | Minerva Anesthesiol                      | Survey design               |
| Yang F              | 2020        | J Med Virol                              | No event rate               |
| Wong K              | 2020        | Cureus                                   | No event rate               |
| Quincho-Lopez A     | 2020        | Am J Trop Med Hyg                        | Review                      |
| Long CJ             | 2020        | BMC Med Imaging                          | No event rate               |
| Jamous F            | 2020        | S D Med                                  | No IMV data available       |
| Xang C              | 2020        | Medicine                                 | No event rate               |
| Chen X              | 2020        | Chin Med Sci J                           | Review                      |
| Yang X              | 2020        | Lancet Respir Med                        | No IMV data available       |
| Zantah M            | 2020        | Respir Res                               | Not ICU setting             |

COVID-19: coronavirus disease 2019; ICU: intensive care unit; IMV: invasive mechanical ventilation;

**Supplementary Table 2.** Events rate and time from intubation to barotrauma development in included studies

| First Author | Non-COVID ARDS control group | COVID-19 IMV patients, number | Control IMV patients, number | PNX rate, COVID-19 | PNX rate, control | PMD rate, COVID-19 | PMD rate, control | Barotrauma rate, combined events, COVID-19* | Barotrauma rate, combined events, control* | Time from intubation to barotrauma, mean +/- SD, days |
|--------------|------------------------------|-------------------------------|------------------------------|--------------------|-------------------|--------------------|-------------------|---------------------------------------------|--------------------------------------------|-------------------------------------------------------|
| Belletti     | No                           | 116                           | N/A                          | 22 (19%)           | N/A               | 13 (11%)           | N/A               | 28 (24%)                                    | N/A                                        | 14.0±11.0                                             |
| Capaccione   | No                           | 132                           | N/A                          | 18 (14%)           | N/A               | N/A                | N/A               | N/A                                         | N/A                                        | 14.9±10.0                                             |
| Edwards      | No                           | 137                           | N/A                          | 4 (2.9%)           | N/A               | 12 (8.8%)          | N/A               | 13 (9%)                                     | N/A                                        | 3.4±0.8                                               |
| Fiacchini    | Yes                          | 30                            | 45                           | 6 (20%)            | 0 (0%)            | 10 (33%)           | 0 (0%)            | 14 (47%)                                    | 0 (0.0%)                                   | N/A                                                   |
| Housman      | No                           | 171                           | N/A                          | N/A                | N/A               | 29 (17%)           | N/A               | N/A                                         | N/A                                        | 2.5±2.3                                               |
| Kahn         | No                           | 39                            | N/A                          | N/A                | N/A               | N/A                | N/A               | 13 (33%)                                    | N/A                                        | N/A                                                   |
| Lemmers      | Yes                          | 169                           | 163                          | N/A                | N/A               | 23 (14%)           | 3 (2%)            | N/A                                         | N/A                                        | 3.8±5.7                                               |
| Mart         | No                           | 92                            | N/A                          | 0 (0%)             | N/A               | 5 (5.4%)           | N/A               | 5 (5%)                                      | N/A                                        | 9-24 <sup>†</sup>                                     |
| McGuinness   | Yes                          | 601                           | 285                          | 54 (9%)            | N/A               | 59 (10%)           | N/A               | 89 (15%)                                    | 28 (10%)                                   | N/A                                                   |
| Talan        | No                           | 96                            | N/A                          | 6 (6%)             | N/A               | 6 (6%)             | N/A               | 9 (9%)                                      | N/A                                        | 5.1±3.1                                               |
| Udi          | No                           | 20                            | N/A                          | 5 (25%)            | N/A               | 5 (25%)            | N/A               | 8 (40%)                                     | N/A                                        | 17.3±10.8                                             |
| Wang         | No                           | 9                             | N/A                          | 5 (56%)            | N/A               | N/A                | N/A               | N/A                                         | N/A                                        | 19.6±10.2                                             |
| Yao          | No                           | 202                           | N/A                          | 12 (6%)            | N/A               | N/A                | N/A               | N/A                                         | N/A                                        | N/A                                                   |

\* Patients with at least one barotrauma event, after exclusion of studies reporting only one event type.

<sup>†</sup> data as range

ARDS: acute respiratory distress syndrome; COVID-19: coronavirus disease 2019; IMV: invasive mechanical ventilation; N/A: not available; PNX: pneumothorax; PMD: pneumomediastinum

**Supplementary Table 3.** Details on mortality data in included studies

| First Author | Non-COVID ARDS control group | COVID-19 IMV patients, number | Control IMV patients, number | PNX mortality, COVID-19 | PNX mortality, control | PMD mortality, COVID-19 | PMD mortality, control | Mortality in COVID-19 patients w/o barotrauma | Mortality in control patients w/o barotrauma |
|--------------|------------------------------|-------------------------------|------------------------------|-------------------------|------------------------|-------------------------|------------------------|-----------------------------------------------|----------------------------------------------|
| Belletti     | No                           | 116                           | N/A                          | N/A                     | N/A                    | N/A                     | N/A                    | 34 (39%)                                      | N/A                                          |
| Capaccione   | No                           | 132                           | N/A                          | 6 (33%)                 | N/A                    | N/A                     | N/A                    | 55 (48%)                                      | N/A                                          |
| Edwards      | No                           | 137                           | N/A                          | 3 (75%)                 | N/A                    | N/A                     | N/A                    | N/A                                           | N/A                                          |
| Fiacchini    | Yes                          | 30                            | 45                           | N/A                     | N/A                    | N/A                     | N/A                    | N/A                                           | N/A                                          |
| Housman      | No                           | 171                           | N/A                          | N/A                     | N/A                    | N/A                     | N/A                    | N/A                                           | N/A                                          |
| Kahn         | No                           | 39                            | N/A                          | N/A                     | N/A                    | N/A                     | N/A                    | N/A                                           | N/A                                          |
| Lemmers      | Yes                          | 169                           | 163                          | N/A                     | N/A                    | 13 (57%)                | N/A                    | 73 (50%)                                      | N/A                                          |
| Mart         | No                           | 92                            | N/A                          | N/A                     | N/A                    | N/A                     | N/A                    | N/A                                           | N/A                                          |
| McGuinness   | Yes                          | 601                           | 285                          | N/A                     | N/A                    | N/A                     | N/A                    | 298 (58%)                                     | 102 (40%)                                    |
| Talan        | No                           | 96                            | N/A                          | N/A                     | N/A                    | N/A                     | N/A                    | N/A                                           | N/A                                          |
| Udi          | No                           | 20                            | N/A                          | N/A                     | N/A                    | N/A                     | N/A                    | N/A                                           | N/A                                          |
| Wang         | No                           | 9                             | N/A                          | 4 (80%)                 | N/A                    | N/A                     | N/A                    | N/A                                           | N/A                                          |
| Yao          | No                           | 202                           | N/A                          | N/A                     | N/A                    | N/A                     | N/A                    | N/A                                           | N/A                                          |

ARDS: acute respiratory distress syndrome; COVID-19: coronavirus disease 2019; IMV: invasive mechanical ventilation; N/A: not available; PNX: pneumothorax; PMD: pneumomediastinum; w/o: without

**Supplementary Table 4.** Details on treatment of pneumothorax/pneumomediastinum

| First Author | Barotrauma rate, any event, COVID-19 | PNX rate, COVID-19 | PMD rate, COVID-19 | COVID-19 barotrauma patients requiring chest tube drainage | COVID-19 PNX patients requiring chest tube drainage | COVID-19 PMD patients requiring chest tube drainage | COVID-19 barotrauma patients requiring surgery | COVID-19 PNX patients requiring surgery | COVID-19 PMD patients requiring surgery |
|--------------|--------------------------------------|--------------------|--------------------|------------------------------------------------------------|-----------------------------------------------------|-----------------------------------------------------|------------------------------------------------|-----------------------------------------|-----------------------------------------|
| Belletti     | 28 (24%)                             | 22 (19%)           | 13 (11%)           | 18 (64%)                                                   | 18 (81.8%)                                          | 0 (0.0%)                                            | 2 (7.1%)                                       | 1 (4.5%)                                | 1 (7.7%)                                |
| Capaccione   | 18 (14%)                             | 18 (14%)           | N/A                | N/A                                                        | N/A                                                 | N/A                                                 | N/A                                            | N/A                                     | N/A                                     |
| Edwards      | 13 (9%)                              | 4 (2.9%)           | 12 (8.8%)          | 6 (46%)                                                    | 4 (100%)                                            | 2 (16.7%)                                           | 0 (0%)                                         | N/A                                     | N/A                                     |
| Fiacchini    | 14 (47%)                             | 6 (20%)            | 10 (33%)           | N/A                                                        | N/A                                                 | N/A                                                 | N/A                                            | N/A                                     | N/A                                     |
| Housman      | 29 (17%)                             | N/A                | 29 (17%)           | 5 (17%)                                                    | 2*                                                  | 3 (10.4%)                                           | 0 (0%)                                         | N/A                                     | N/A                                     |
| Kahn         | 13 (33%)                             | N/A                | N/A                | N/A                                                        | N/A                                                 | N/A                                                 | N/A                                            | N/A                                     | N/A                                     |
| Lemmers      | 23 (14%)                             | N/A                | 23 (14%)           | N/A                                                        | N/A                                                 | N/A                                                 | N/A                                            | N/A                                     | N/A                                     |
| Mart         | 5 (5.4%)                             | 0 (0%)             | 5 (5.4%)           | 0 (0%)                                                     | 0 (0%)                                              | 0 (0%)                                              | 0 (0%)                                         | N/A                                     | N/A                                     |
| McGuinness   | 89 (15%)                             | 54 (9%)            | 59 (10%)           | N/A                                                        | N/A                                                 | N/A                                                 | N/A                                            | N/A                                     | N/A                                     |
| Talan        | 9 (9%)                               | 6 (6%)             | 6 (6%)             | 0 (0%)                                                     | 0 (0%)                                              | 0 (0%)                                              | 0 (0%)                                         | N/A                                     | N/A                                     |
| Udi          | 8 (40%)                              | 5 (25%)            | 5 (25%)            | 5 (63%)                                                    | 5 (100%)                                            | N/A                                                 | N/A                                            | N/A                                     | N/A                                     |
| Wang         | 5 (56%)                              | 5 (56%)            | N/A                | 2 (40%)                                                    | 2 (40%)                                             | N/A                                                 | N/A                                            | N/A                                     | N/A                                     |
| Yao          | 12 (6%)                              | 12 (6%)            | N/A                | N/A                                                        | N/A                                                 | N/A                                                 | N/A                                            | N/A                                     | N/A                                     |

\* the total number of patients with PNX was not available in the study.

ARDS: acute respiratory distress syndrome; COVID-19: coronavirus disease 2019; IMV: invasive mechanical ventilation; N/A: not available; PNX: pneumothorax; PMD: pneumomediastinum

**Supplementary Table 5.** Mechanical ventilation settings for COVID-19 ARDS patients at beginning of invasive mechanical ventilation

|                   | TV,<br>PBT<br>(ml/Kg)   | TV,<br>w/o PBT<br>(ml/Kg) | RR,<br>PBT<br>(Breaths<br>/min) | RR,<br>w/o PBT<br>(Breaths<br>/min) | Peak<br>pressure,<br>PBT<br>(cm H2O) | Peak<br>pressure,<br>w/o PBT<br>(cm H2O) | Plateau<br>pressure,<br>PBT<br>(cm H2O) | Plateau<br>pressure,<br>w/o PBT<br>(cm H2O) | PEEP,<br>PBT,<br>(cm H2O) | PEEP,<br>w/o PBT,<br>(cm H2O) | FiO <sub>2</sub> ,<br>PBT,<br>(%) | FiO <sub>2</sub> ,<br>w/o PBT<br>(%) | Prone<br>position,<br>PBT | Prone<br>position<br>w/o PBT |
|-------------------|-------------------------|---------------------------|---------------------------------|-------------------------------------|--------------------------------------|------------------------------------------|-----------------------------------------|---------------------------------------------|---------------------------|-------------------------------|-----------------------------------|--------------------------------------|---------------------------|------------------------------|
| <b>Belletti</b>   | 6.8<br>(5.9 –<br>7.6) * | 6.8<br>(6.0 –<br>7.4) *   | N/A                             | N/A                                 | 28*<br>(26 – 30)                     | 28*<br>(21 – 32)                         | N/A                                     | N/A                                         | 11*<br>(10 – 14)          | 12*<br>(10 – 14)              | N/A                               | N/A                                  | N/A                       | N/A                          |
| <b>Capaccione</b> | N/A                     | N/A                       | 24.9†                           | 24.8†                               | N/A                                  | N/A                                      | N/A                                     | N/A                                         | 12.1†                     | 13.3†                         | 90.6†                             | 69†                                  | N/A                       | N/A                          |
| <b>Edwards</b>    | N/A                     | N/A                       | N/A                             | N/A                                 | N/A                                  | N/A                                      | N/A                                     | N/A                                         | N/A                       | N/A                           | N/A                               | N/A                                  | N/A                       | N/A                          |
| <b>Fiacchini</b>  | N/A                     | N/A                       | N/A                             | N/A                                 | N/A                                  | N/A                                      | N/A                                     | N/A                                         | 12 (3)*                   | 12 (2)*                       | N/A                               | N/A                                  | N/A                       | N/A                          |
| <b>Housman</b>    | N/A                     | N/A                       | N/A                             | N/A                                 | N/A                                  | N/A                                      | N/A                                     | N/A                                         | N/A                       | N/A                           | N/A                               | N/A                                  | N/A                       | N/A                          |
| <b>Kahn</b>       | 7.1±2.1†                | 8.4±2.5†                  | N/A                             | N/a                                 | 25.3±8.8<br>†                        | 25.0±1.4<br>†                            | N/A                                     | N/A                                         | 6.5±2.1†                  | 7.0±2.4†                      | N/A                               | N/A                                  | N/A                       | N/A                          |
| <b>Lemmers</b>    | 6.1±0.9†                | 5.9±0.8†                  | N/A                             | N/A                                 | 30±5†                                | 29±5†                                    | 24±6                                    | 23±4                                        | 12<br>(8-15)*             | 12<br>(10-14)*                | N/A                               | N/A                                  | N/A                       | N/A                          |
| <b>Mart</b>       | N/A                     | N/A                       | N/A                             | N/A                                 | N/A                                  | N/A                                      | N/A                                     | N/A                                         | N/A                       | N/A                           | N/A                               | N/A                                  | N/A                       | N/A                          |
| <b>McGuinness</b> | N/A                     | N/A                       | N/A                             | N/A                                 | N/A                                  | N/A                                      | N/A                                     | N/A                                         | N/A                       | N/A                           | N/A                               | N/A                                  | N/A                       | N/A                          |
| <b>Talan</b>      | N/A                     | N/A                       | N/A                             | N/A                                 | 30.6±4.1                             | N/A                                      | N/A                                     | N/A                                         | 8.8±1.0                   | N/A                           | N/A                               | N/A                                  | 1                         | N/A                          |
| <b>Udi</b>        | N/A                     | N/A                       | N/A                             | N/A                                 | N/A                                  | N/A                                      | N/A                                     | N/A                                         | N/A                       | N/A                           | N/A                               | N/A                                  | N/A                       | N/A                          |
| <b>Wang</b>       | 5.4±0.3†                | N/A                       | N/A                             | N/A                                 | 21.5±3.9<br>†                        | N/A                                      | N/A                                     | <30                                         | N/A                       | 9.3±2.6†                      | N/A                               | N/A                                  | N/A                       | N/A                          |
| <b>Yao</b>        | N/A                     | N/A                       | N/A                             | N/A                                 | N/A                                  | N/A                                      | N/A                                     | N/A                                         | N/A                       | N/A                           | N/A                               | N/A                                  | N/A                       | N/A                          |

\* data as median (IQR); † data as mean or mean ± standard deviation

FiO<sub>2</sub>: fraction of inspired oxygen; N/A: not available; PBT: pulmonary barotrauma; PEEP: positive end expiratory pressure; RR: respiratory rate; TV: tidal volume; w/o: without

**Supplementary Table 6.** Mechanical ventilation settings for COVID-19 ARDS patients at time of first barotrauma event

|                   | TV,<br>PBT<br>(ml/Kg)  | TV<br>w/o PBT<br>(ml/Kg) | RR,<br>PBT<br>(Breaths<br>/min) | RR,<br>w/o PBT<br>(Breaths<br>/min) | Peak<br>pressure,<br>PBT<br>(cm<br>H2O) | Peak<br>pressure,<br>w/o PBT<br>(cm<br>H2O) | Plateau<br>pressure,<br>PBT<br>(cm<br>H2O) | Plateau<br>pressure,<br>w/o PBT<br>(cm<br>H2O) | PEEP,<br>PBT,<br>(cm<br>H2O) | PEEP,<br>w/o PBT,<br>(cm<br>H2O) | FiO <sub>2</sub> ,<br>PBT,<br>(%) | FiO <sub>2</sub> ,<br>w/o PBT<br>(%) | Prone<br>position,<br>PBT | Prone<br>position<br>w/o PBT |
|-------------------|------------------------|--------------------------|---------------------------------|-------------------------------------|-----------------------------------------|---------------------------------------------|--------------------------------------------|------------------------------------------------|------------------------------|----------------------------------|-----------------------------------|--------------------------------------|---------------------------|------------------------------|
| <b>Belletti</b>   | N/A                    | N/A                      | N/A                             | N/a                                 | N/A                                     | N/A                                         | N/A                                        | N/A                                            | N/A                          | N/A                              | N/A                               | N/A                                  | N/A                       | N/A                          |
| <b>Capaccione</b> | N/A                    | N/A                      | N/A                             | N/A                                 | N/A                                     | N/A                                         | N/A                                        | N/A                                            | N/A                          | N/A                              | N/A                               | N/A                                  | N/A                       | N/A                          |
| <b>Edwards</b>    | 5.5 ±<br>0.8*          | N/A                      | 20±5.9*                         | N/A                                 | 33.1±9.9<br>*                           | N/A                                         | N/A                                        | N/A                                            | 15.5±4.6<br>*                | N/A                              | 71.5±22.<br>3*                    | N/A                                  | N/A                       | N/A                          |
| <b>Fiacchini</b>  | N/A                    | N/A                      | N/A                             | N/A                                 | N/A                                     | N/A                                         | N/A                                        | N/A                                            | N/A                          | N/A                              | N/A                               | N/A                                  | N/A                       | N/A                          |
| <b>Housman</b>    | N/A                    | N/A                      | N/A                             | N/A                                 | 32<br>(24 – 38)                         | N/A                                         | N/A                                        | N/A                                            | 13<br>(10- 15)               | N/A                              | N/A                               | N/A                                  | N/A                       | N/A                          |
| <b>Kahn</b>       | 6.8±1.5                | 7.7±2.6                  | N/A                             | N/a                                 | 29.4±7.5                                | 35.7±9.3                                    | N/A                                        | N/A                                            | 12±5.5                       | 11.8±5.5                         | N/A                               | N/A                                  | N/A                       | N/A                          |
| <b>Lemmers</b>    | 6.7±1.7                | N/A                      | N/A                             | N/A                                 | 29±5                                    | N/A                                         | 22±4                                       | N/A                                            | 9<br>(6 – 13)                | N/A                              | N/A                               | N/A                                  | N/A                       | N/a                          |
| <b>Mart</b>       | N/A                    | N/A                      | N/A                             | N/A                                 | N/A                                     | N/A                                         | N/A                                        | N/A                                            | N/A                          | N/A                              | N/A                               | N/A                                  | N/A                       | N/A                          |
| <b>McGuinness</b> | N/A                    | N/A                      | N/A                             | N/A                                 | N/A                                     | N/A                                         | N/A                                        | N/A                                            | N/A                          | N/A                              | N/A                               | N/A                                  | N/A                       | N/A                          |
| <b>Talan</b>      | N/A                    | N/A                      | N/A                             | N/A                                 | N/A                                     | N/A                                         | N/A                                        | N/A                                            | N/A                          | N/A                              | N/A                               | N/A                                  | 1                         | N/A                          |
| <b>Udi</b>        | 5.4<br>(0.4 –<br>8.6)‡ | N/A                      | 24<br>(15 – 32)<br>‡            | N/A                                 | 29<br>(27 – 35)<br>‡                    | N/A                                         | 27<br>(19 – 30)<br>‡                       | N/A                                            | 14<br>(5 – 24) ‡             | N/A                              | 60<br>(35 – 90)<br>‡              | N/A                                  | 4                         | N/A                          |
| <b>Wang</b>       | N/A                    | N/A                      | N/A                             | N/A                                 | N/A                                     | N/A                                         | N/A                                        | N/A                                            | N/A                          | N/A                              | N/A                               | N/A                                  | N/A                       | N/A                          |
| <b>Yao</b>        | N/A                    | N/A                      | N/A                             | N/A                                 | N/A                                     | N/A                                         | N/A                                        | N/A                                            | N/A                          | N/A                              | N/A                               | N/A                                  | N/A                       | N/A                          |

\* Data as mean ± SD; † data as mean (range); ‡ data as median (range)

FiO<sub>2</sub>: fraction of inspired oxygen; N/A: not available; PBT: pulmonary barotrauma; PEEP: positive end expiratory pressure; RR: respiratory rate; TV: tidal volume; w/o: without



**Supplementary Table 7.** Case reports details

| Suppl Ref | n of patients included | Ventilation at time of event | # of survivors | Treatment for PNx/PMD                       | Time from intubation to PNx/PMD                                      |
|-----------|------------------------|------------------------------|----------------|---------------------------------------------|----------------------------------------------------------------------|
| 1         | 1                      | NIV                          | 1              | chest tube drainage                         | not reported                                                         |
| 2         | 1                      | IMV                          | 1              | conservative                                | not reported                                                         |
| 3         | 1                      | HFNC                         | 1              | conservative                                | not reported                                                         |
| 4         | 1                      | NIV                          | 0              | conservative                                | not reported                                                         |
| 5         | 1                      | NIV                          | 1              | chest tube drainage                         | not reported                                                         |
| 6         | 5                      | IMV                          | 3              | chest tube drainage (4)<br>conservative (1) | 4 hours (1)<br>2 days (2)<br>5 days (1)<br>6 days (1)<br>14 days (1) |
| 7         | 1                      | spontaneous breathing        | 1              | conservative                                | not reported                                                         |
| 8         | 1                      | spontaneous breathing        | 1              | conservative                                | not reported                                                         |
| 9         | 1                      | spontaneous breathing        | 1              | conservative                                | not reported                                                         |
| 10        | 1                      | spontaneous breathing        | 1              | conservative                                | not reported                                                         |
| 11        | 1<br>(barotrauma)      | CPAP                         | 1              | conservative                                | not reported                                                         |
| 12        | 1                      | IMV                          | 1              | chest tube drainage                         | not reported                                                         |
| 13        | 1                      | IMV                          | not reported   | not reported                                | present before the intubation                                        |
| 14        | 1                      | spontaneous breathing        | 1              | chest tube drainage                         | not reported                                                         |
| 15        | 2                      | spontaneous breathing        | 2              | conservative                                | not reported                                                         |
| 16        | 1                      | IMV                          | 1              | chest tube drainage                         | not reported                                                         |
| 17        | 2                      | IMV                          | not reported   | chest tube drainage                         | caused by the intubation                                             |
| 18        | 1                      | NIV                          | 1              | conservative                                | not reported                                                         |
| 19        | 11                     | IMV (7); NIV (4)             | 7              | not reported                                | not reported                                                         |
| 20        | 1                      | spontaneous breathing        | 1              | conservative                                | not reported                                                         |
| 21        | 2                      | IMV                          | 0              | conservative                                | present before the intubation                                        |
| 22        | 1                      | IMV                          | 0              | chest tube drainage                         | 5 days                                                               |
| 23        | 1                      | oxygen therapy               | 1              | conservative                                | not reported                                                         |
| 24        | 75                     | NIV (69)                     | 4 (C); 19 (I)  | chest tube drainage (64)                    | conservative (4.4 days)<br>invasive (8.2 days)                       |

|    |    |                             |                  |                                           |                                    |
|----|----|-----------------------------|------------------|-------------------------------------------|------------------------------------|
| 25 | 3  | NIV (2); CPAP (1)           | 0                | conservative (2) - pleural drainage (1)   | not reported                       |
| 26 | 1  | IMV                         | 1                | conservative                              | 14 days                            |
| 27 | 1  | oxygen therapy              | 1                | chest tube drainage                       | not reported                       |
| 28 | 3  | NIV                         | 2                | conservative (2); chest tube drainage (1) | not reported                       |
| 29 | 1  | NIV                         | 1                | chest tube drainage                       | not reported                       |
| 30 | 2  | IMV                         | 2                | chest tube drainage                       | 5 days (1); 2 days (1)             |
| 31 | 10 | NIV (7); IMV (3)            | 4 (NIV); 3 (IMV) | chest tube drainage (5); conservative (5) | on average. 5,5 days               |
| 32 | 1  | NIV                         | 1                | conservative                              | not reported                       |
| 33 | 1  | spontaneous breathing       | 1                | chest tube drainage                       | not reported                       |
| 34 | 1  | NIV                         | 1                | conservative                              | not reported                       |
| 35 | 1  | spontaneous breathing       | 1                | conservative                              | not reported                       |
| 36 | 1  | oxygen therapy              | 1                | decompression; then, chest tube drainage  | not reported                       |
| 37 | 7  | IMV (5); NIV (2)            | 6                | conservative (4); chest tube drainage (3) | present before the intubation (5)  |
| 38 | 1  | NIV                         | 1                | conservative                              | not reported                       |
| 39 | 1  | NIV                         | 0                | conservative                              | not reported                       |
| 40 | 1  | spontaneous breathing       | 1                | chest tube drainage                       | not reported                       |
| 41 | 1  | spontaneous breathing       | 1                | chest tube drainage                       | not reported                       |
| 42 | 1  | spontaneous breathing       | 1                | chest tube drainage                       | not reported                       |
| 43 | 3  | oxygen therapy              | 3                | chest tube drainage (2); conservative (1) | not reported                       |
| 44 | 1  | NIV                         | 1                | chest tube drainage                       | not reported                       |
| 45 | 1  | spontaneous breathing       | 1                | conservative                              | not reported                       |
| 46 | 1  | spontaneous breathing       | 1                | chest tube drainage                       | not reported                       |
| 47 | 1  | NIV                         | 0                | conservative                              | not reported                       |
| 48 | 3  | IMV (1); HFNC (1)           | 1                | chest tube drainage (2); conservative (1) | 4 days (1); 3 days (1); 9 days (1) |
| 49 | 1  | IMV                         | 1                | chest tube drainage                       | not reported                       |
| 50 | 3  | NIV                         | 3                | conservative                              | not reported                       |
| 51 | 3  | NIV (2); oxygen therapy (1) | 1                | conservative (3)                          | not reported                       |

|    |                                               |                       |                      |                                               |                                                                                      |
|----|-----------------------------------------------|-----------------------|----------------------|-----------------------------------------------|--------------------------------------------------------------------------------------|
| 52 | 1                                             | IMV                   | 1                    | decompression; then, chest tube drainage      | not reported                                                                         |
| 53 | 1                                             | NIV                   | 1                    | conservative                                  | not reported                                                                         |
| 54 | 9                                             | IMV                   | 6                    | chest tube drainage (8); conservative (1)     | 5 days (1); 4 days (1); 1 day (2); 34 days (1); 2 days (1); 47 days (1); 16 days (1) |
| 55 | 1                                             | IMV                   | 1                    | chest tube drainage                           | 19 days                                                                              |
| 56 | 1                                             | IMV                   | 1                    | chest tube drainage                           | not reported                                                                         |
| 57 | 1                                             | IMV                   | 1                    | chest tube drainage                           | 30 days                                                                              |
| 58 | 1                                             | IMV                   | 0                    | chest tube drainage                           | 2 days                                                                               |
| 59 | 1                                             | IMV                   | 0                    | chest tube drainage                           | 1 day                                                                                |
| 60 | 2                                             | NIV                   | 2                    | conservative                                  | not reported                                                                         |
| 61 | 1                                             | IMV                   | 1                    | chest tube drainage                           | 14 days                                                                              |
| 62 | 1                                             | IMV                   | 1                    | chest tube drainage                           | 3 days                                                                               |
| 63 | 1                                             | IMV                   | 1                    | chest tube drainage                           | 7 days                                                                               |
| 64 | 2                                             | IMV                   | 2                    | chest tube drainage                           | not reported                                                                         |
| 65 | 1                                             | CPAP                  | 1                    | chest tube drainage                           | not reported                                                                         |
| 66 | 1                                             | IMV                   | 1                    | conservative                                  | 12 days                                                                              |
| 67 | 1                                             | spontaneous breathing | 1                    | conservative                                  | not reported                                                                         |
| 68 | 3                                             | spontaneous breathing | 3                    | chest tube drainage (2); thoracic surgery (1) | not reported                                                                         |
| 69 | 11 (6 only with hydrothorax; 5 also with PNX) | IMV                   | 3 (only hydrothorax) | chest tube drainage                           | not reported                                                                         |
| 70 | 4                                             | IMV                   | 3                    | chest tube drainage                           | not reported                                                                         |
| 71 | 1                                             | NIV                   | 1                    | conservative                                  | not reported                                                                         |
| 72 | 1                                             | IMV                   | 1                    | conservative                                  | 0 days                                                                               |
| 73 | 5                                             | IMV                   | 2                    | chest tube drainage                           | from 1 to 12 days                                                                    |
| 74 | 1                                             | IMV                   | 0                    | conservative                                  | 17 days                                                                              |
| 75 | 1                                             | IMV                   | 0                    | conservative                                  | not reported                                                                         |
| 76 | 1                                             | IMV                   | 1                    | chest tube drainage                           | 2 days                                                                               |

|     |                     |                             |   |                                                                |                                                  |
|-----|---------------------|-----------------------------|---|----------------------------------------------------------------|--------------------------------------------------|
| 77  | 2                   | IMV                         | 2 | chest tube drainage, then blebs resection and pleurectomy      | 0 days                                           |
| 78  | 1                   | IMV                         | 1 | chest tube drainage                                            | 47 days                                          |
| 79  | 1                   | spontaneous breathing       | 1 | chest tube drainage                                            | not reported                                     |
| 80  | 2                   | NIV (1); oxygen therapy (1) | 2 | conservative (1); chest tube drainage (1)                      | not reported                                     |
| 81  | 1                   | IMV                         | 1 | chest tube drainage                                            | 3 days                                           |
| 82  | 2                   | IMV                         | 2 | decompression (1); decompression, then chest tube drainage (1) | 5 days (1); 2 days (1)                           |
| 83  | 1                   | IMV                         | 1 | chest tube drainage                                            | not reported                                     |
| 84  | 1                   | IMV                         | 1 | chest tube drainage                                            | not reported                                     |
| 85  | 4                   | IMV                         | 2 | conservative                                                   | 4 days (1); not reported (1); 31 days (1); 1 day |
| 86  | 1                   | IMV                         | 1 | chest tube drainage                                            | 26 days                                          |
| 87  | 1                   | IMV                         | 1 | chest tube drainage                                            | 21 days                                          |
| 88  | 1                   | IMV                         | 1 | conservative, then chest tube drainage                         | not reported                                     |
| 89  | 1                   | IMV                         | 1 | emergency compression + chest tube drainage                    | 28 days                                          |
| 90  | 1                   | IMV                         | 1 | surgery                                                        | 10 days                                          |
| 91  | 6                   | NIV                         | 5 | chest tube drainage                                            | not reported                                     |
| 92  | 1                   | spontaneous breathing       | 1 | chest tube drainage                                            | not reported                                     |
| 93  | 2                   | CPAP                        | 2 | Needle thoracentesis followed by chest tube drainage           | not reported                                     |
| 94  | 1                   | spontaneous breathing       | 1 | conservative                                                   | not reported                                     |
| 95  | 1                   | IMV                         | 1 | chest tube drainage                                            | 30 days                                          |
| 96  | 1                   | not reported                | 1 | chest tube drainage                                            | not reported                                     |
| 97  | 1                   | IMV                         | 1 | chest tube drainage                                            | 10 days                                          |
| 98  | 1                   | NIV                         | 1 | chest tube drainage                                            | not reported                                     |
| 99  | 1                   | IMV                         | 1 | chest tube drainage                                            | not reported                                     |
| 100 | 1                   | IMV                         | 1 | chest tube drainage                                            | 16 days                                          |
| 101 | 1                   | NIV                         | 0 | chest tube drainage                                            | present before the intubation                    |
| 102 | 2 (only 1 with PNX) | IMV (1)                     | 2 | chest tube drainage (1)                                        | 5 days                                           |

|     |   |                   |              |                     |              |
|-----|---|-------------------|--------------|---------------------|--------------|
| 103 | 1 | IMV               | 1            | chest tube drainage | 5 days       |
| 104 | 1 | HFNC              | 1            | conservative        | not reported |
| 105 | 1 | HFNC              | 1            | chest tube drainage | not reported |
| 106 | 1 | IMV               | 1            | chest tube drainage | 4 weeks      |
| 107 | 2 | HFNC (1); IMV (1) | not reported | not reported        | not reported |

CPAP: continuous positive airway pressure; HFNC: high-flow nasal cannula; IMV: invasive mechanical ventilation; NIV: non-invasive ventilation; PMD: pneumomediastinum; PNX: pneumothorax

**Supplementary Figure 1.** Forest plot for time from intubation to first barotrauma event

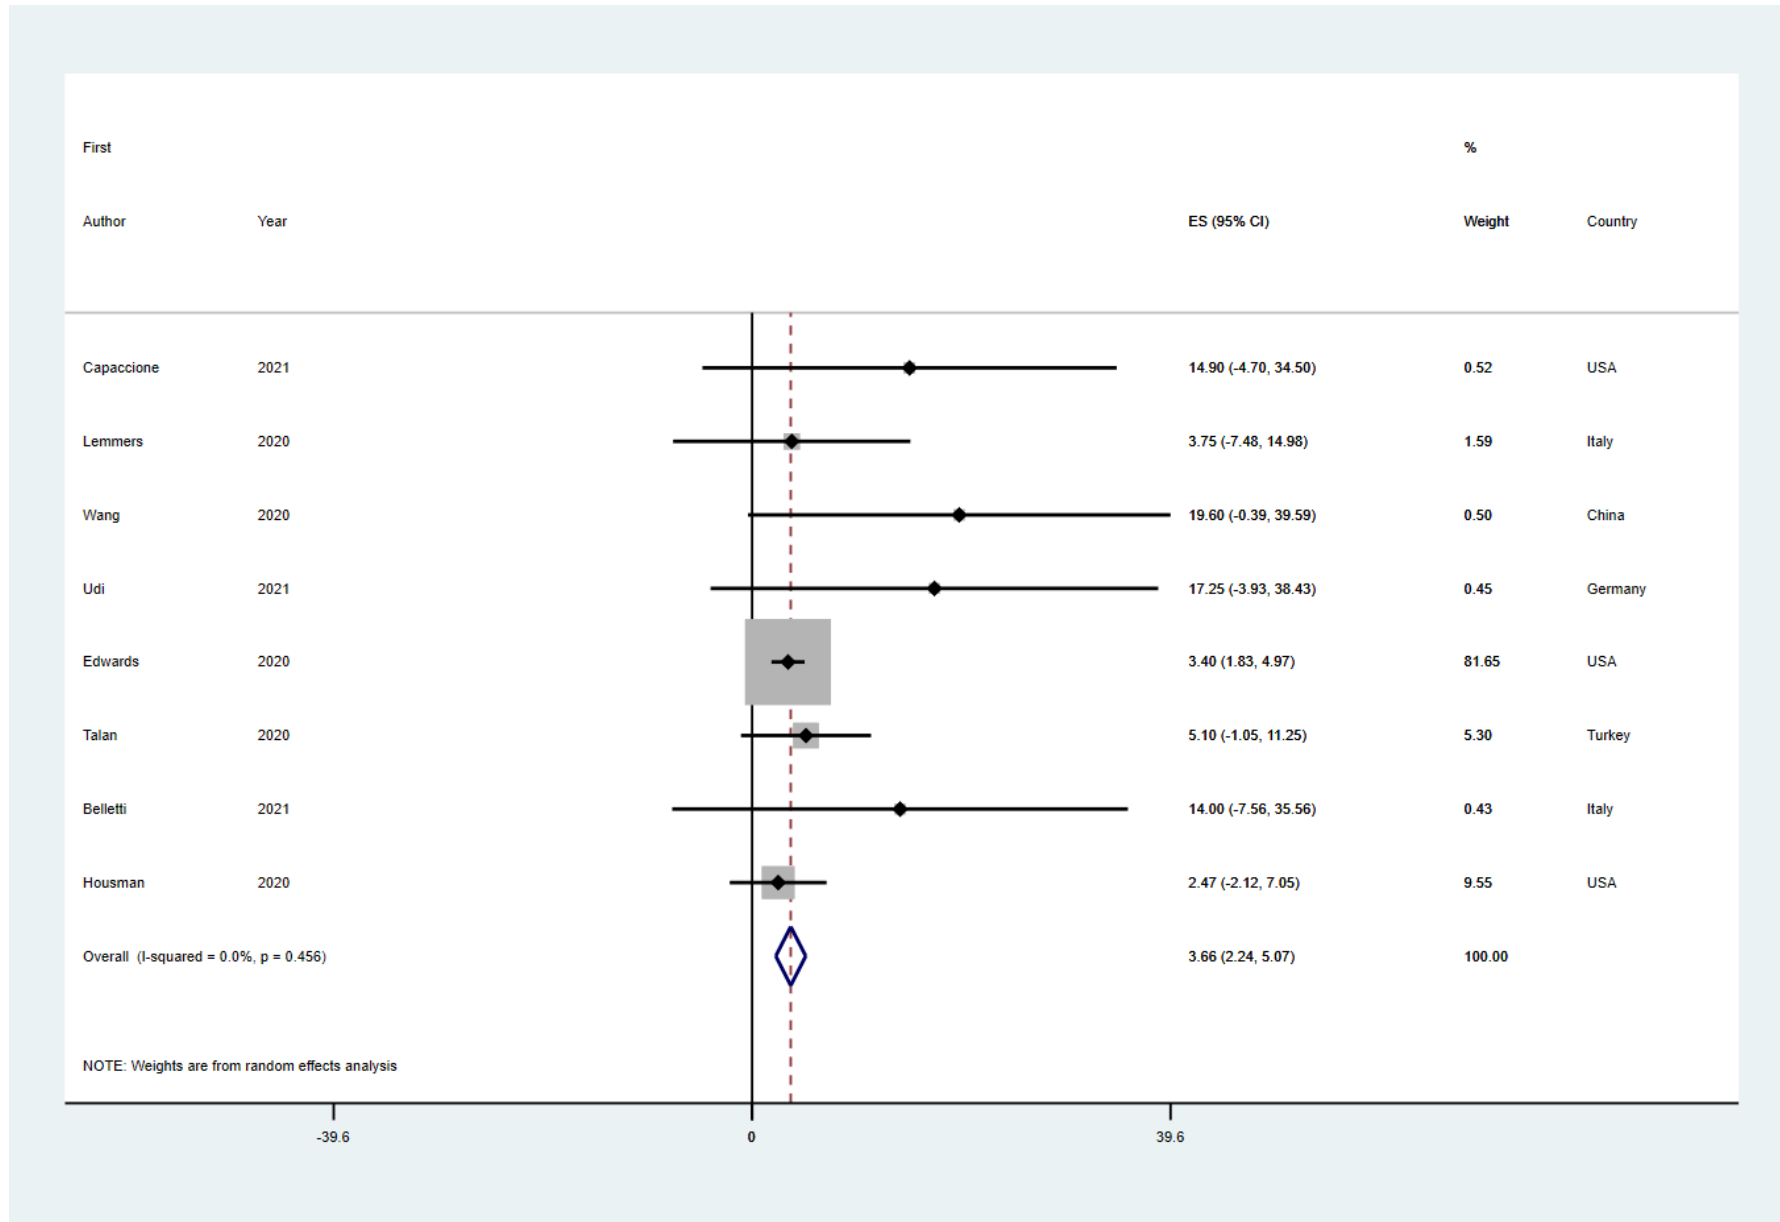

**Supplementary Figure 2.** Forest plot for pneumothorax rate in COVID-19 ARDS patients

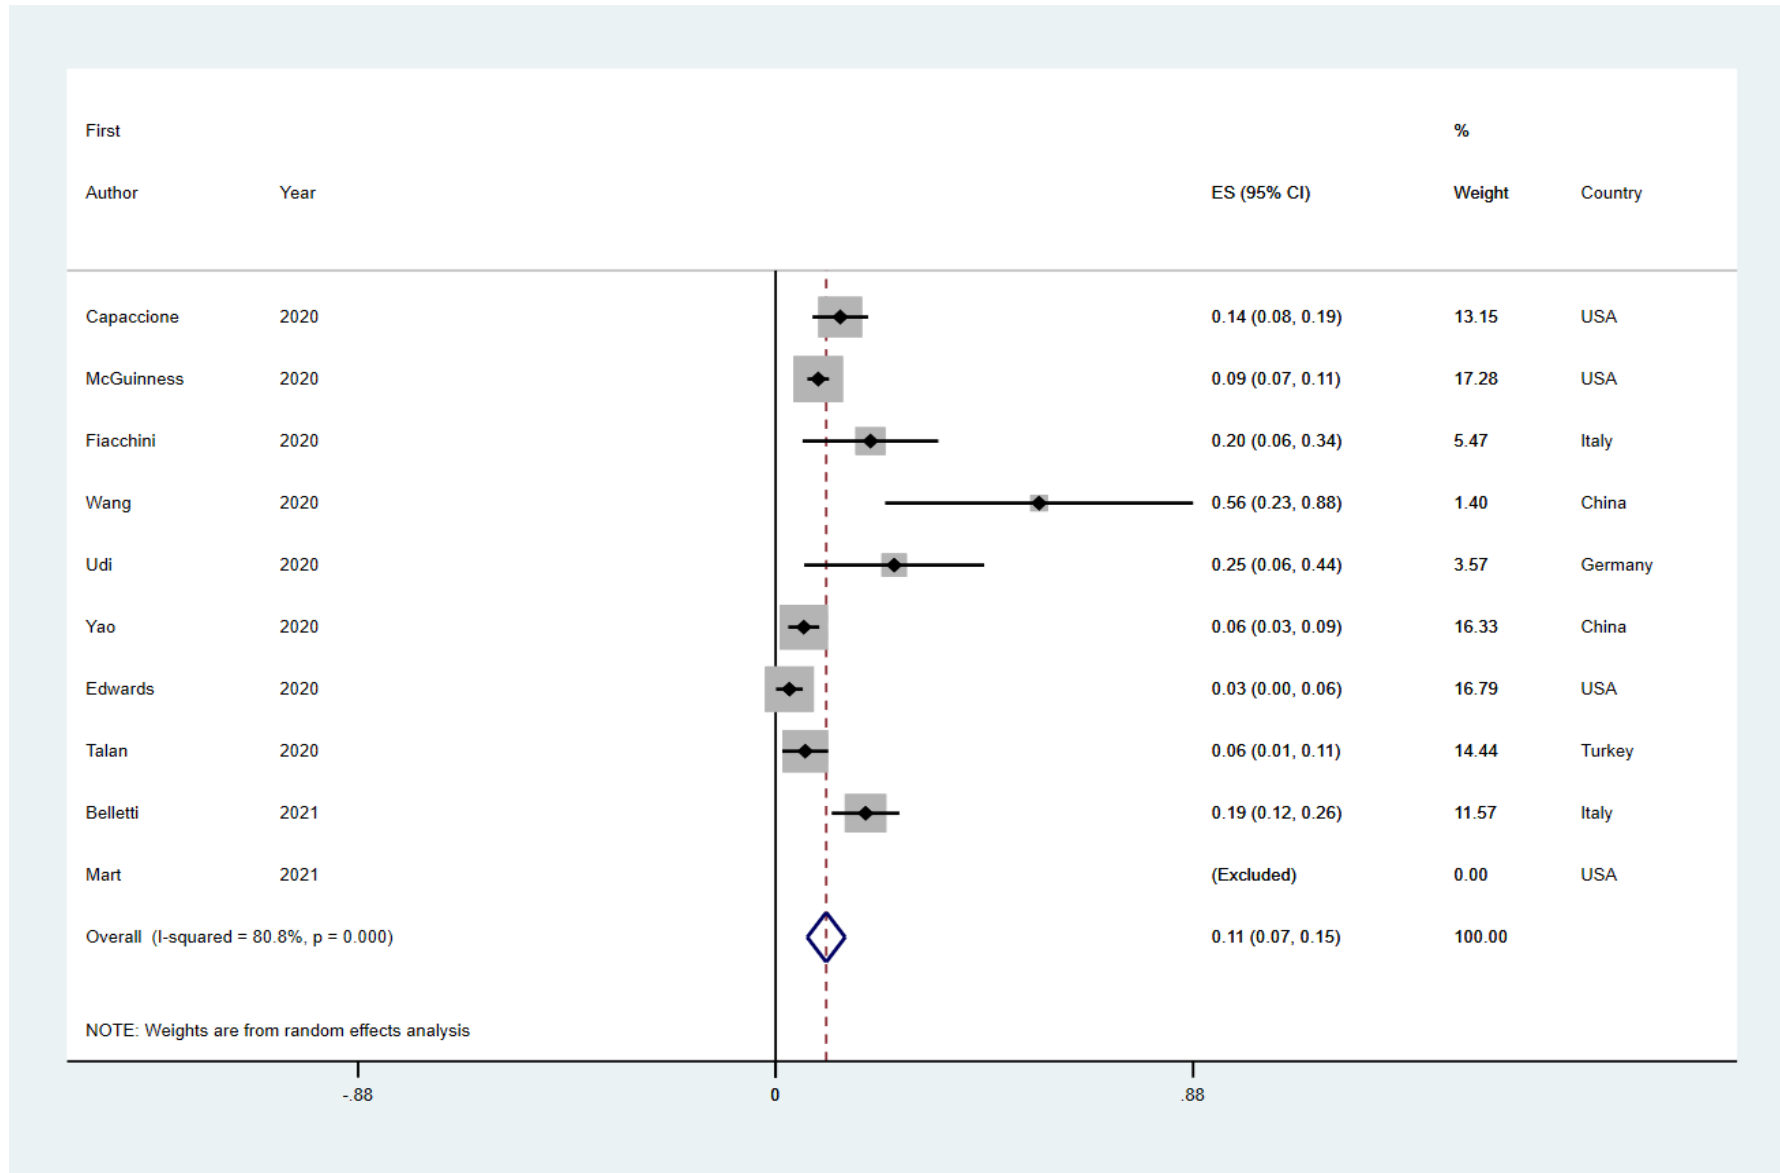

**Supplementary Figure 3.** Forest plot for pneumomediastinum rate in COVID-19 ARDS patients

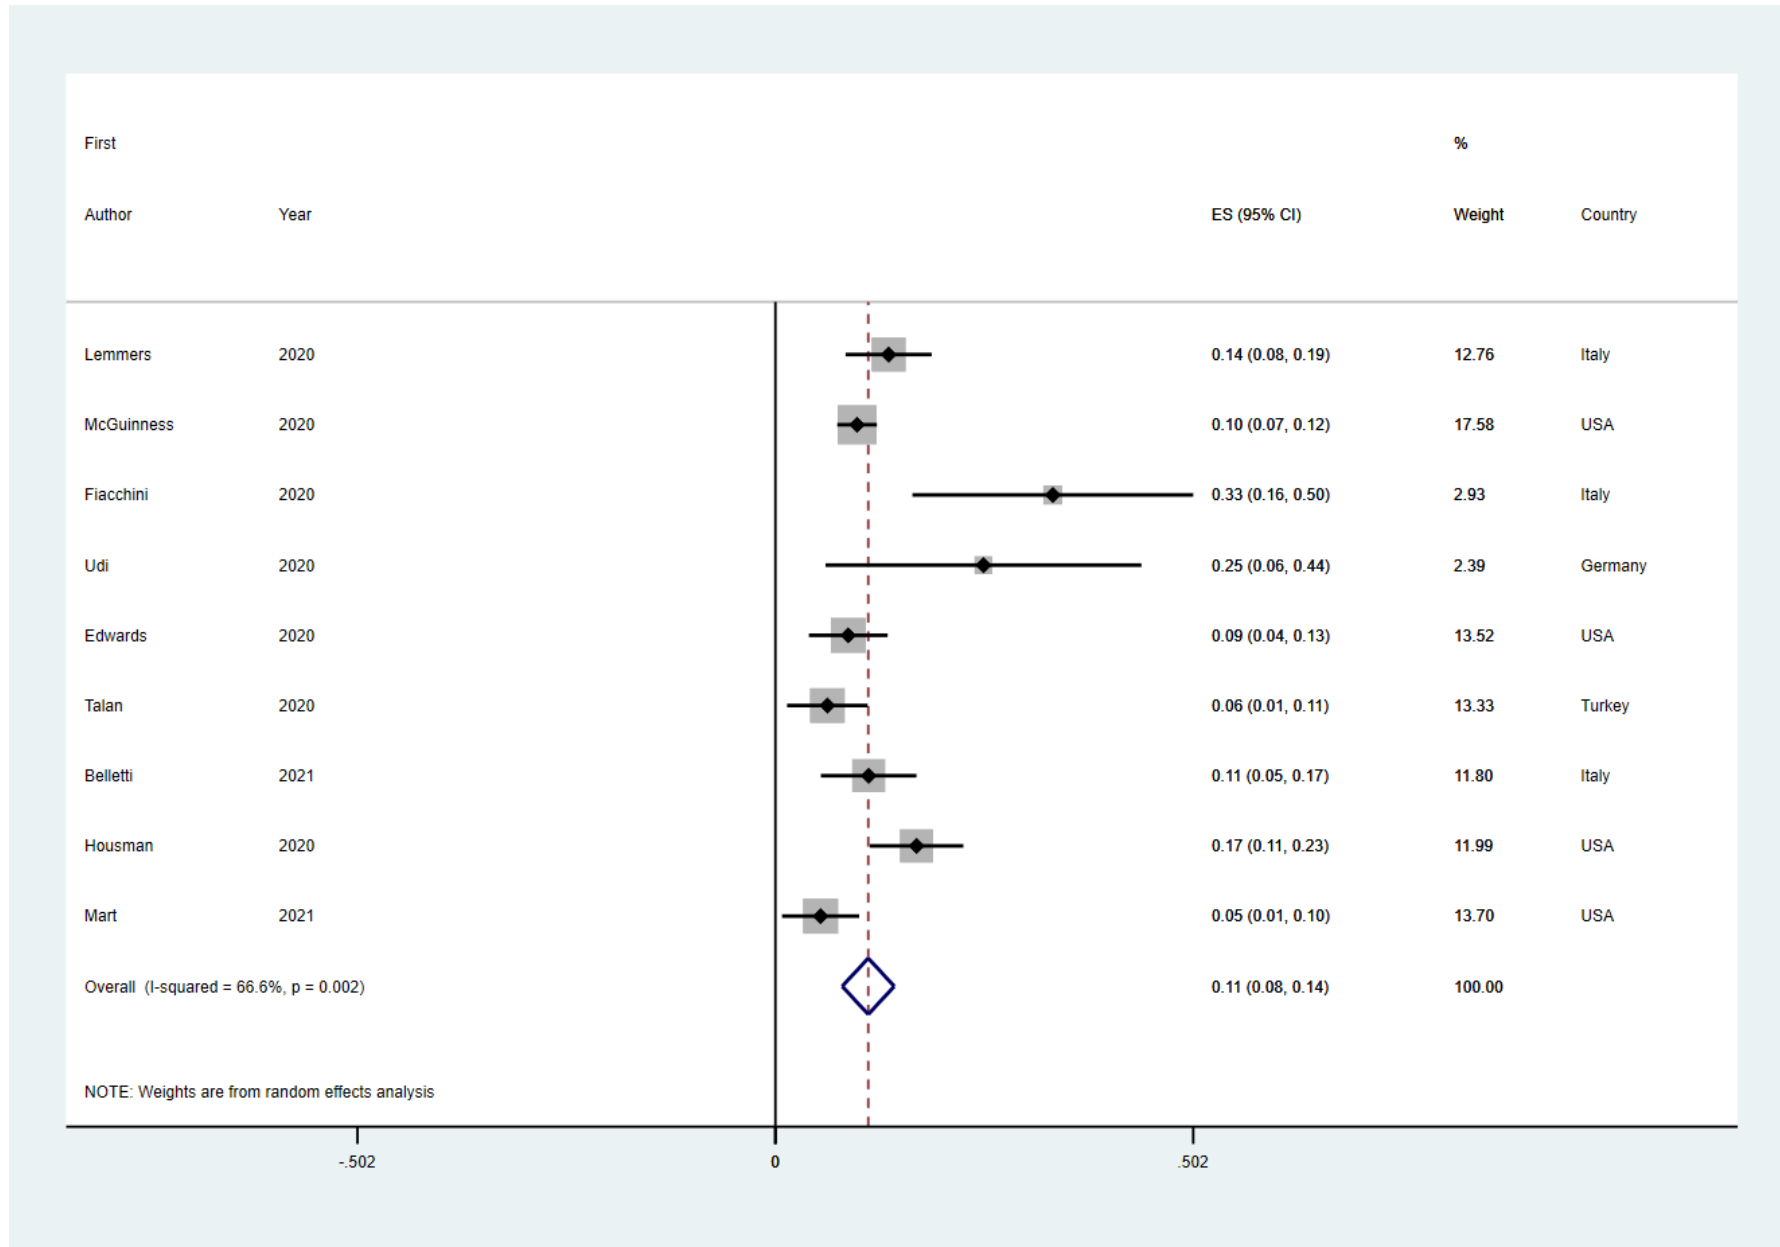



**Supplementary Figure 4.** Forest plot for pneumomediastinum rate in non-COVID-19 ARDS patients

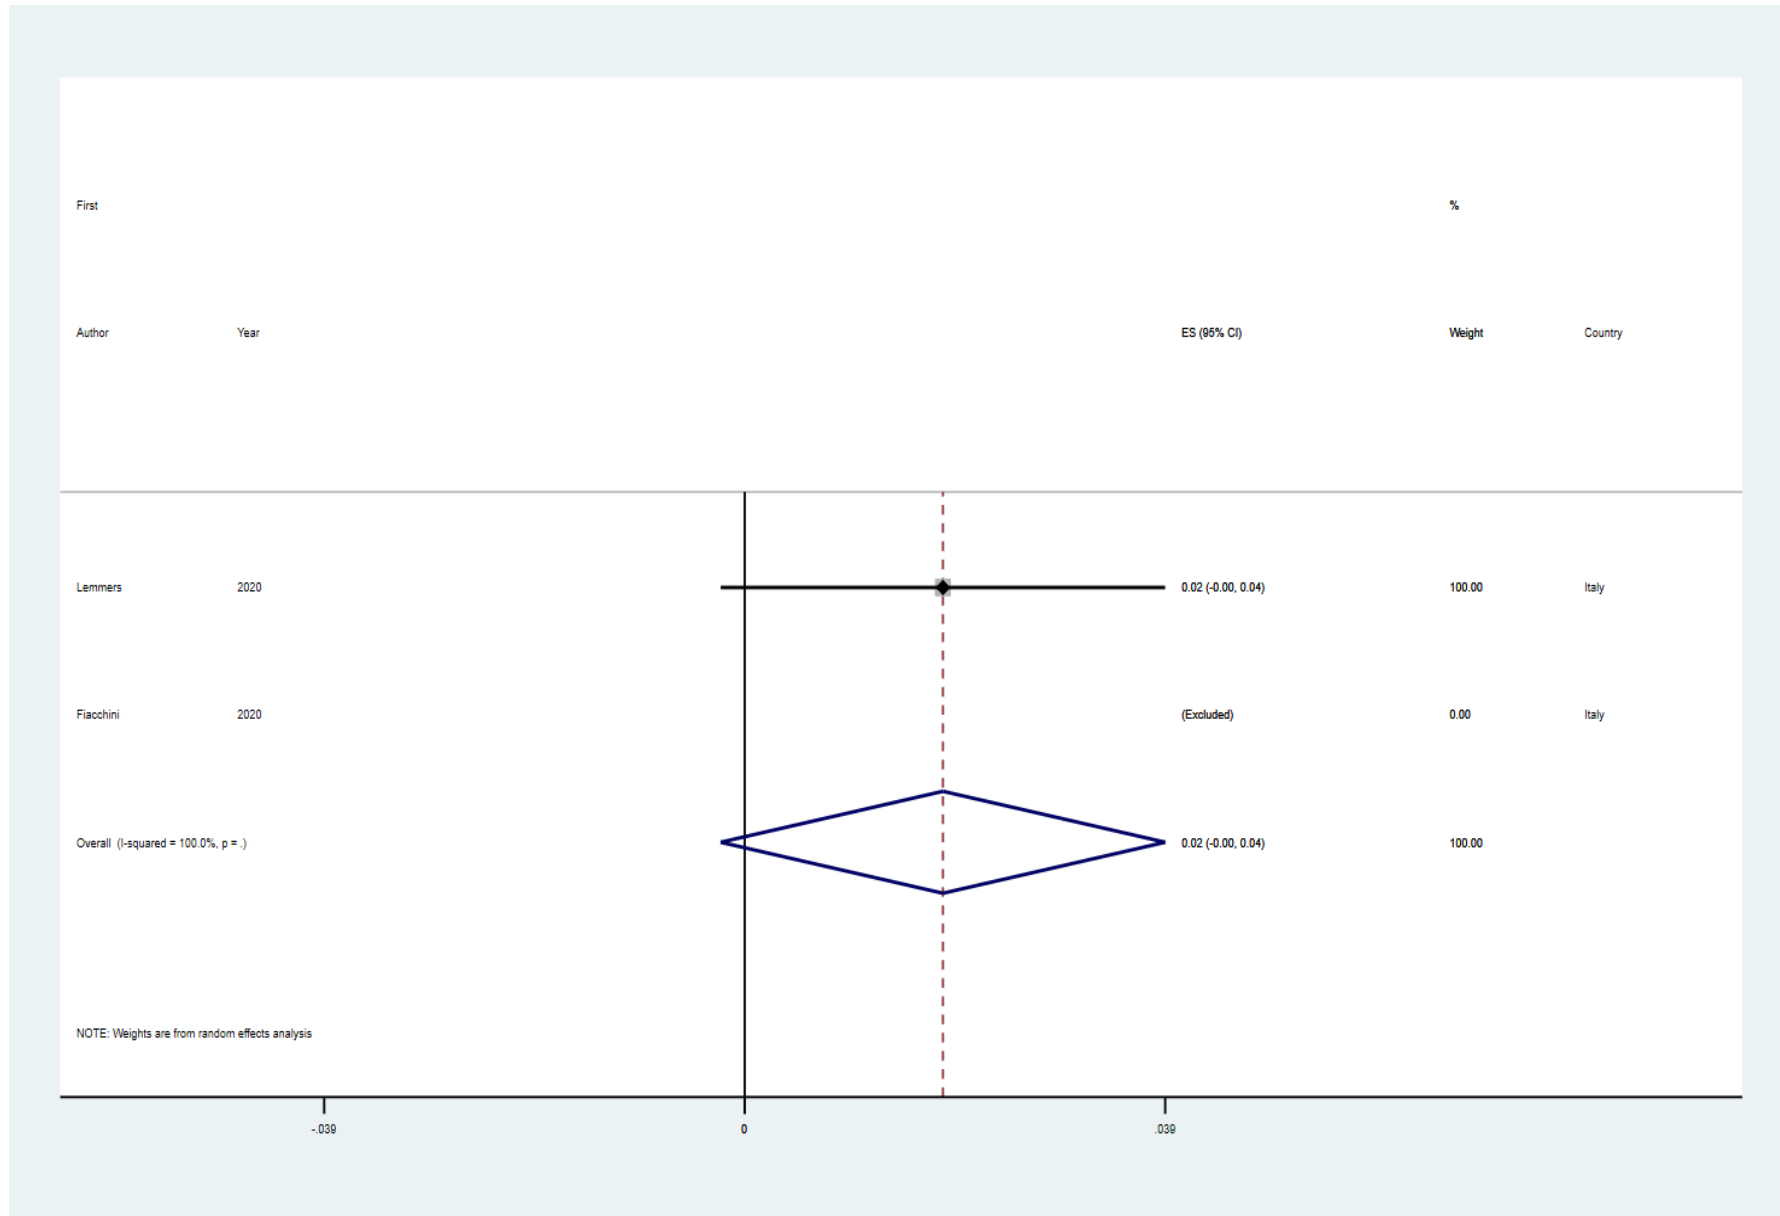

**Supplementary Figure 5.** Forest plot for mortality rate in COVID-19 ARDS patients with barotrauma events

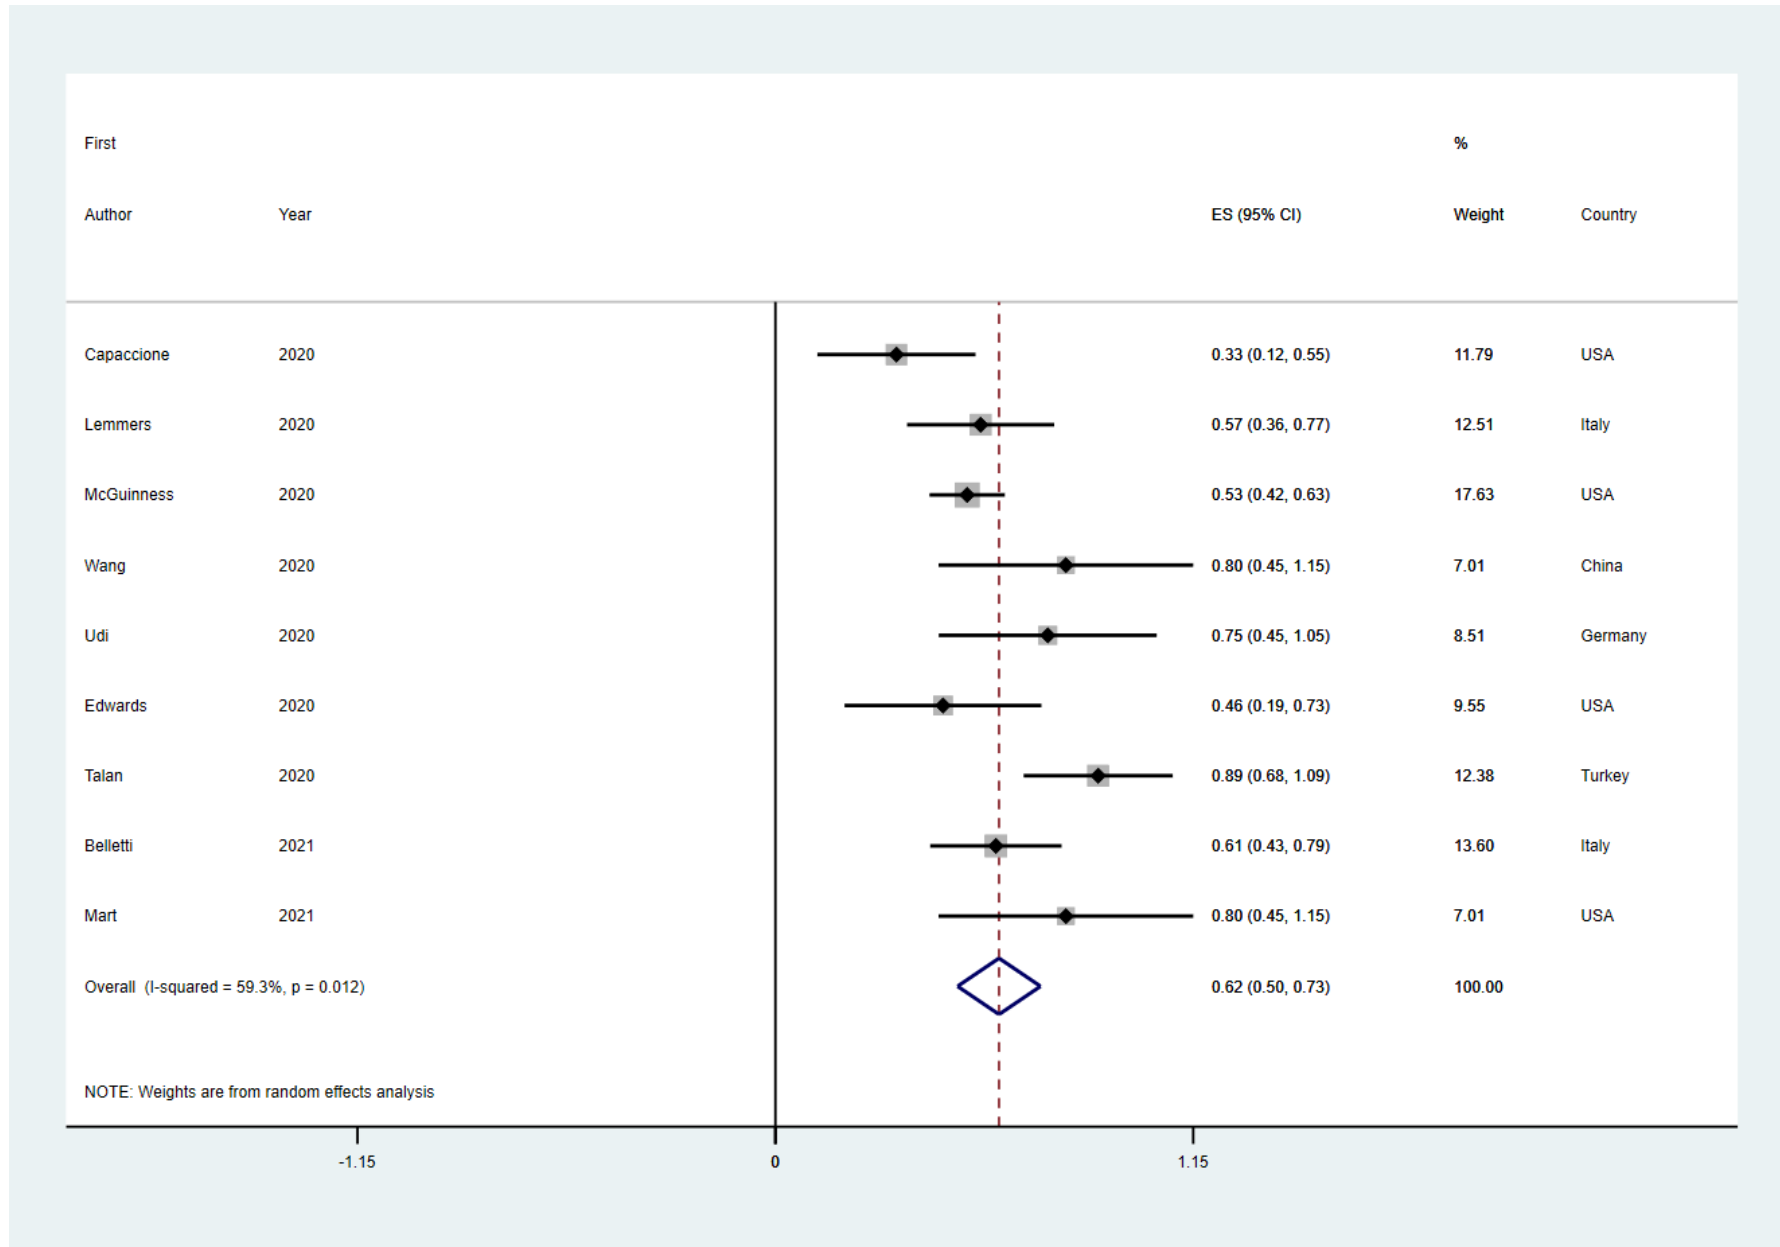

**Supplementary Figure 6.** Forest plot for barotrauma rate in non-COVID-19 ARDS patients

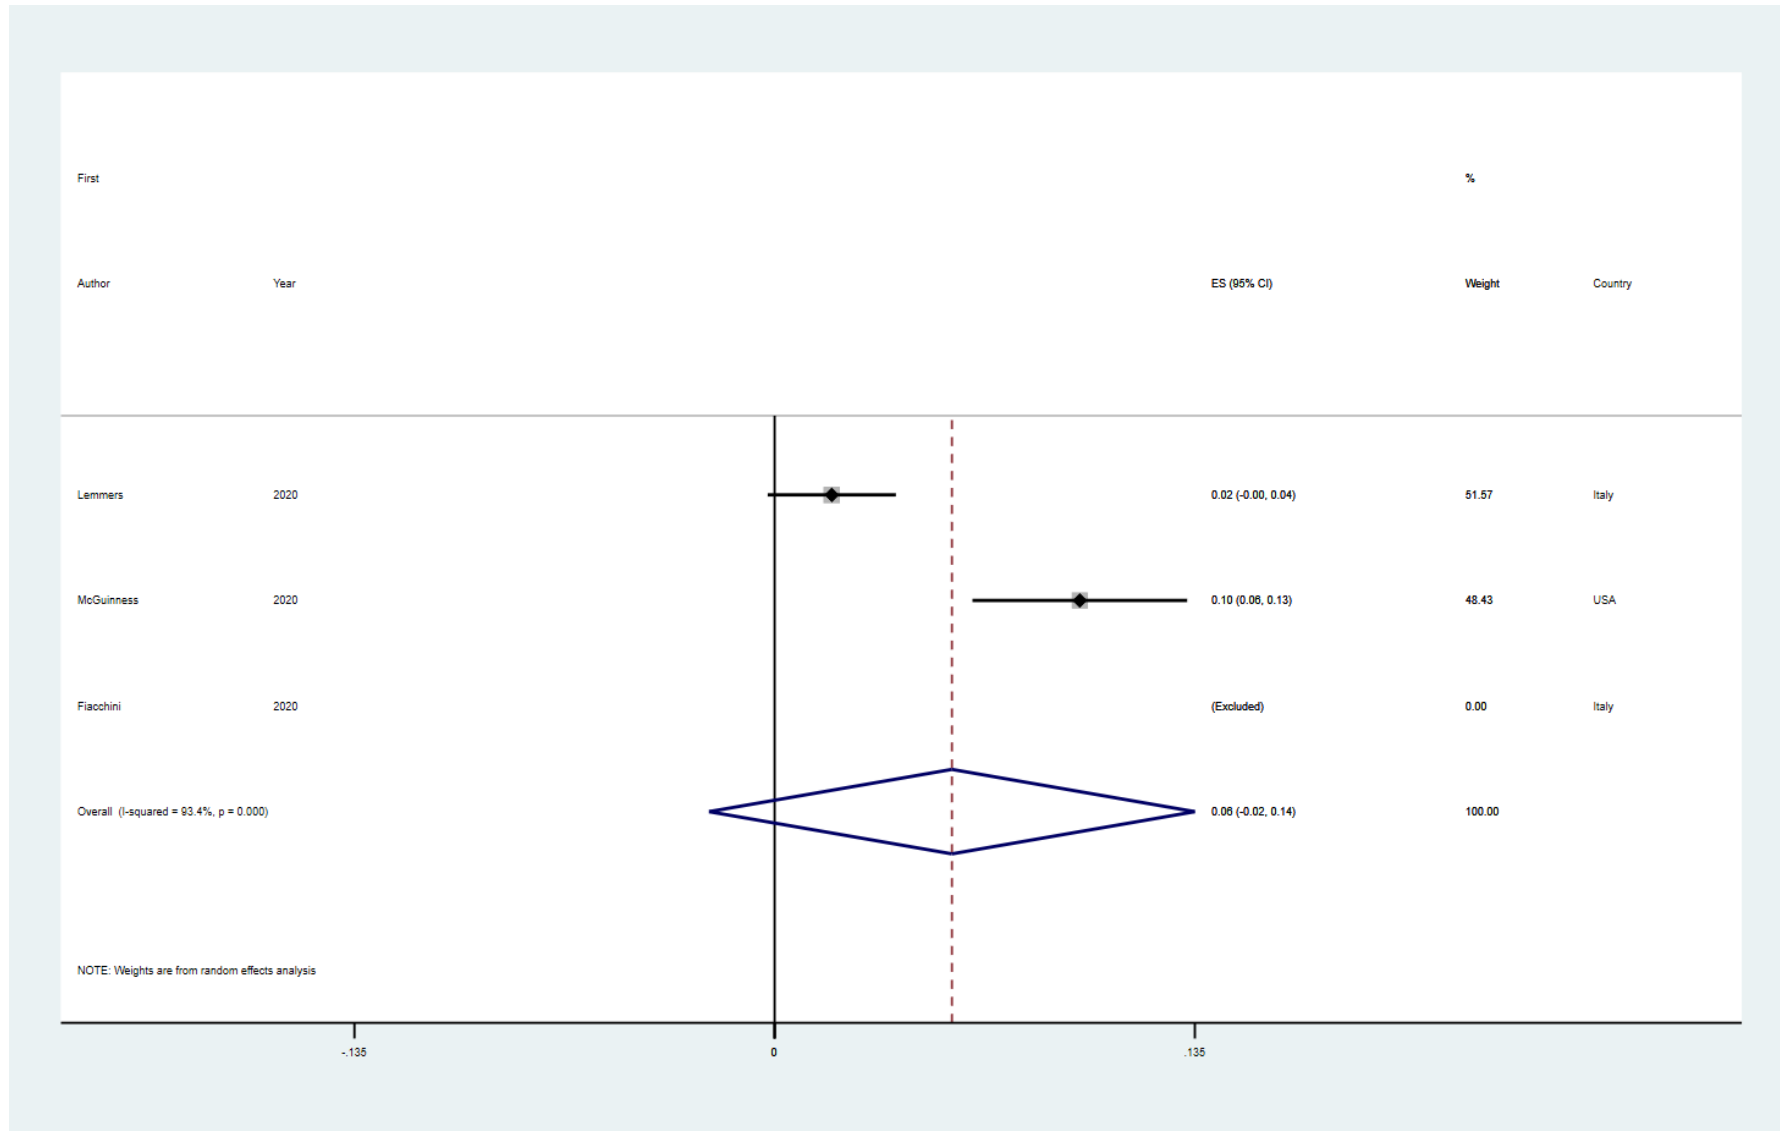

**Supplementary Figure 7.** Forest plot for mortality rate in COVID-19 ARDS patients without barotrauma

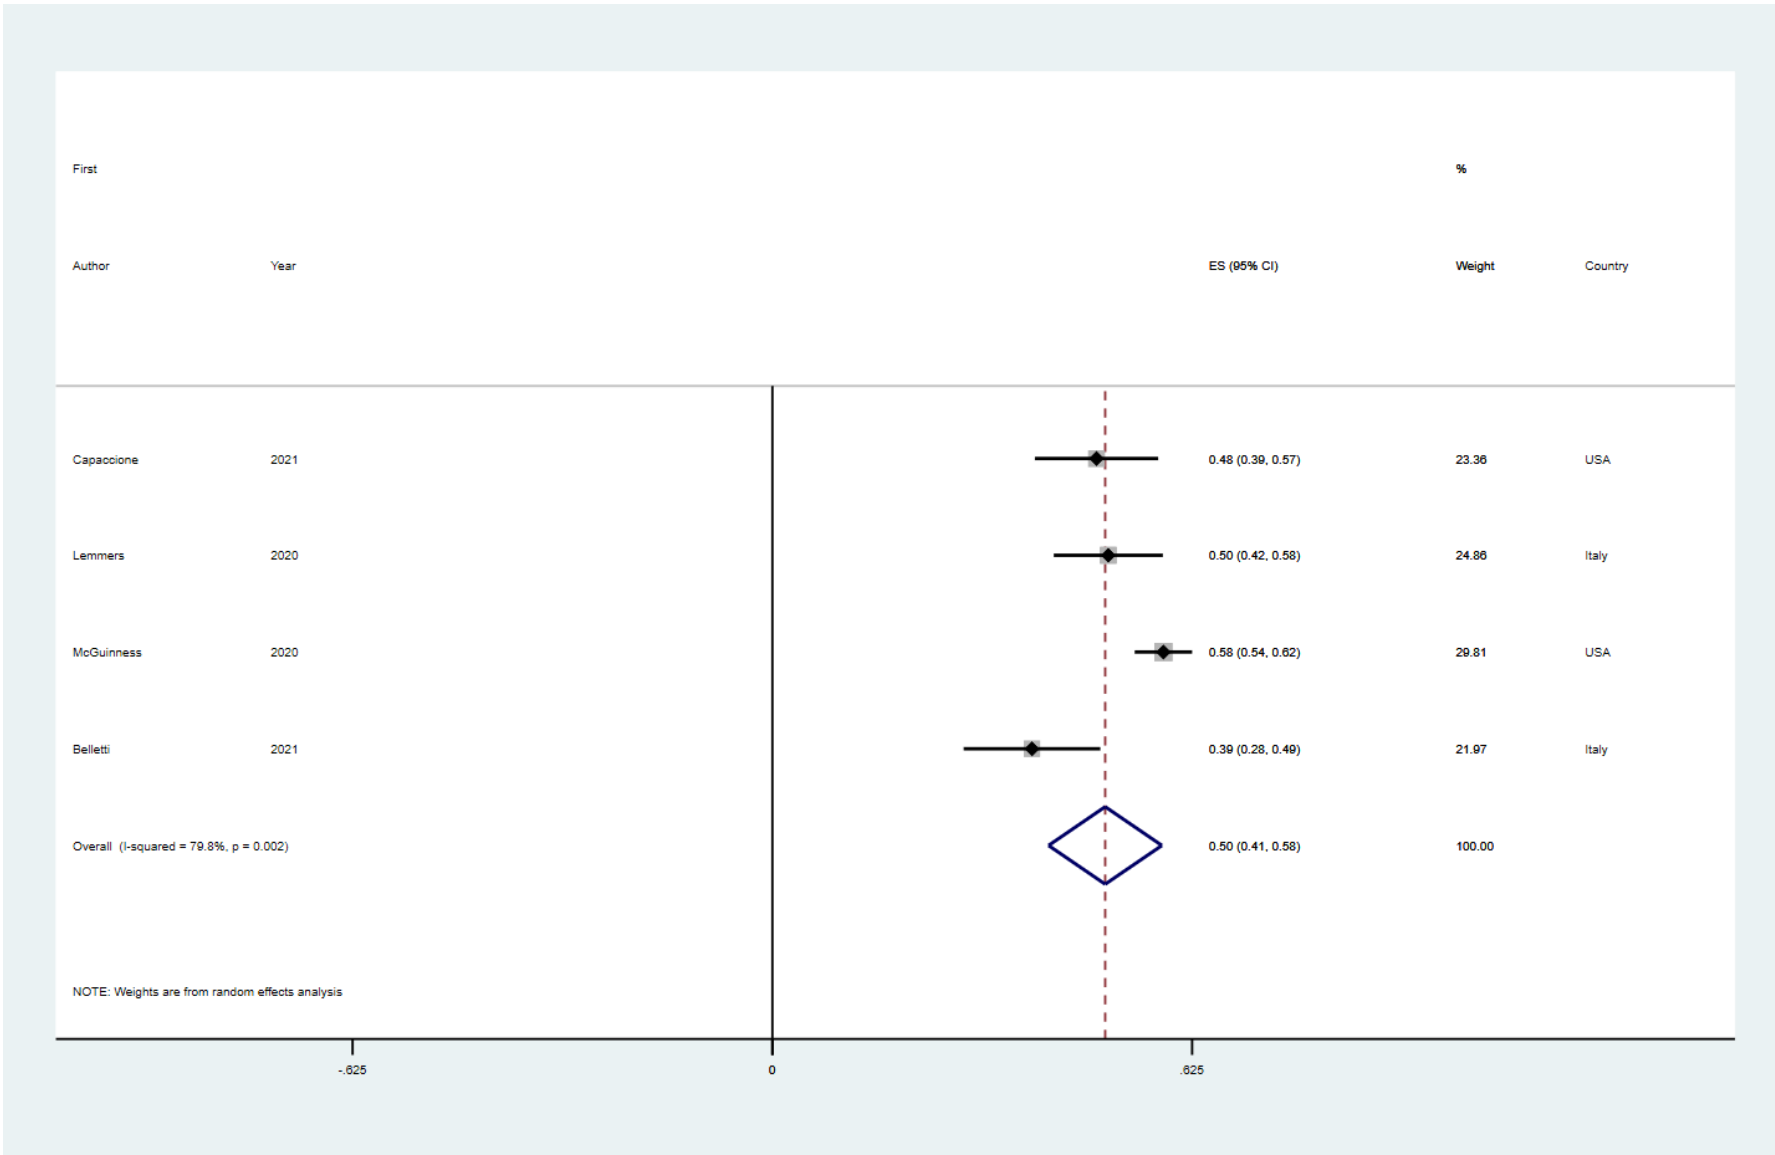

**Supplementary Figure 8.** Forest plot for mortality rate in COVID-19 ARDS patients with pneumothorax.

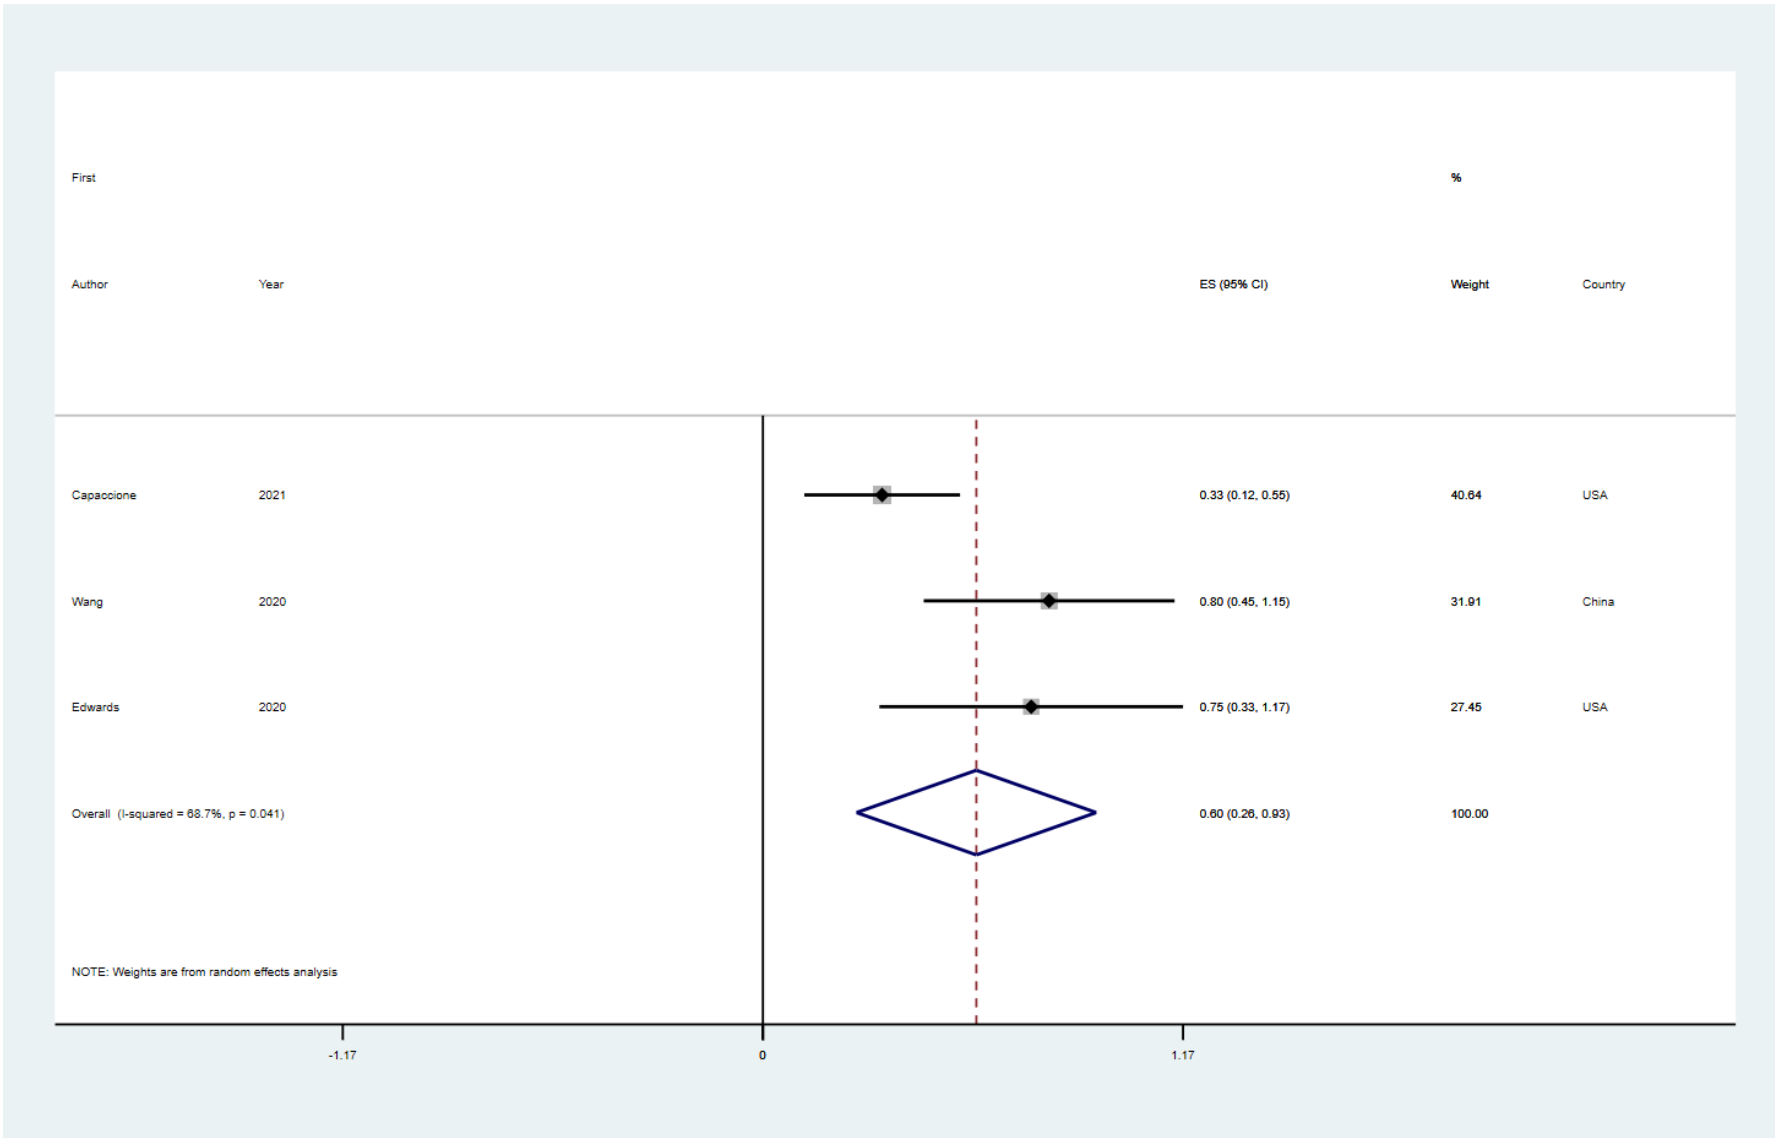

**Supplementary Figure 9.** Forest plot for barotrauma rate in COVID-19 ARDS patients, after excluding studies reporting only one type of barotrauma event

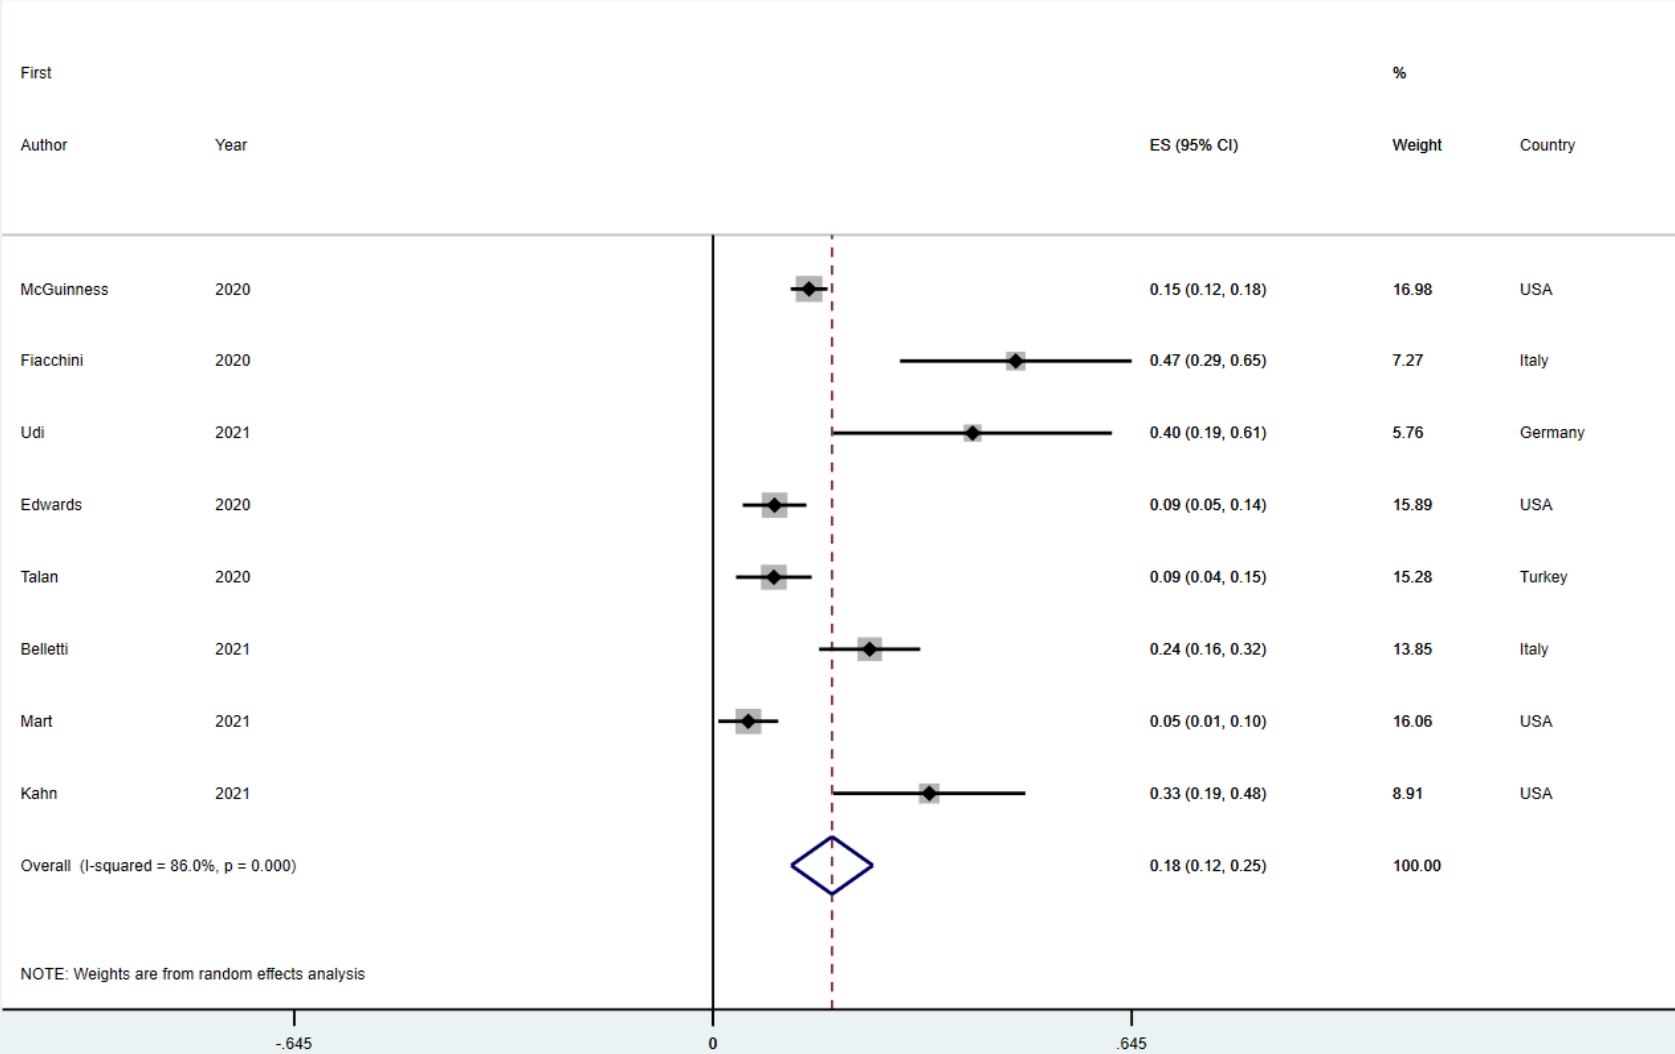

**Supplementary Figure 10.** Forest plot for barotrauma rate in non-COVID-19 ARDS patients, after excluding studies reporting only one type of barotrauma event

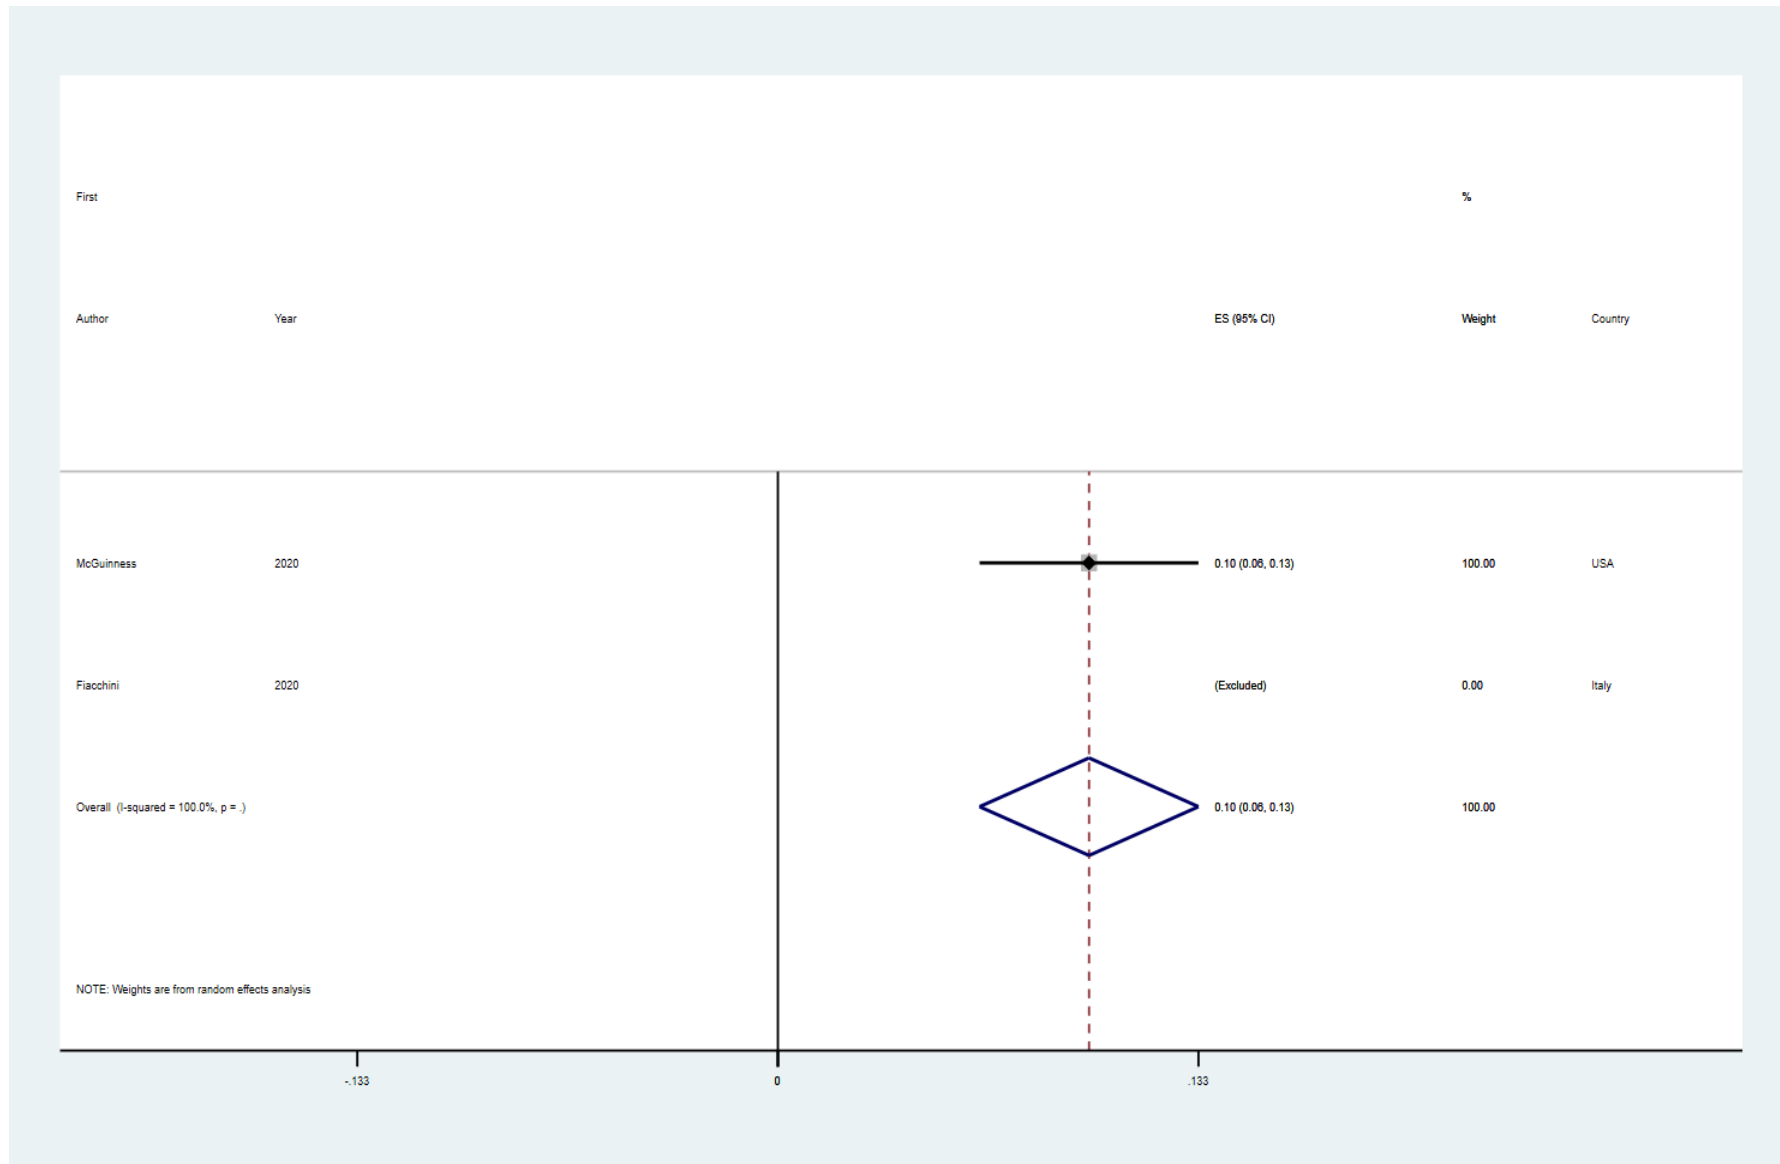

## Supplementary references

1. Ucpinar, B. A., Sahin, C., & Yanc, U. (2020). Spontaneous pneumothorax and subcutaneous emphysema in COVID-19 patient: Case report. *Journal of Infection and Public Health*, *13*(6), 887–889. <https://doi.org/10.1016/j.jiph.2020.05.012>
2. Sanivarapu, R. R., Farraj, K., Sayedy, N., & Anjum, F. (2020). Rapidly developing large pneumatocele and spontaneous pneumothorax in SARS-CoV-2 infection. *Respiratory Medicine Case Reports*, *31*, 101303. <https://doi.org/10.1016/j.rmcr.2020.101303>
3. Sun, R., Liu, H., & Wang, X. (2020). Mediastinal emphysema, giant bulla, and pneumothorax developed during the course of COVID-19 Pneumonia. *Korean Journal of Radiology*, *21*(5), 541–544. <https://doi.org/10.3348/kjr.2020.0180>
4. Wang, J., Su, X., Zhang, T., & Zheng, C. (2020). Spontaneous pneumomediastinum: A probable unusual complication of Coronavirus disease 2019 (COVID-19) pneumonia. *Korean Journal of Radiology*, *21*(5), 627–628. <https://doi.org/10.3348/kjr.2020.0281>
5. Campisi, A., Poletti, V., Ciarrocchi, A. P., Salvi, M., & Stella, F. (2020). Tension pneumomediastinum in patients with COVID-19. *Thorax*, *75*(12), 1130–1131. <https://doi.org/10.1136/thoraxjnl-2020-215012>
6. Wali, A., Rizzo, V., Bille, A., Routledge, T., & Chambers, A. J. (2020). Pneumomediastinum following intubation in COVID-19 patients: a case series. *Anaesthesia*, *75*(8), 1076–1081. <https://doi.org/10.1111/anae.15113>
7. Mimouni, H., Diyas, S., Ouachaou, J., Laaribi, I., Oujidi, Y., Merbouh, M., ... Housni, B. (2020). Spontaneous pneumomediastinum associated with covid-19 pneumonia. *Case Reports in Medicine*, *2020*, 17–19. <https://doi.org/10.1155/2020/4969486>
8. Goldman, N., Ketheeswaran, B., & Wilson, H. (2020). COVID-19-associated pneumomediastinum. *Clinical Medicine, Journal of the Royal College of Physicians of London*, *20*(4), 91–92. <https://doi.org/10.7861/CLINMED.2020-0247>
9. Mohan, V., & Tauseen, R. A. (2020). Spontaneous pneumomediastinum in COVID-19. *BMJ Case Reports*, *13*(5), 1–2. <https://doi.org/10.1136/bcr-2020-236519>
10. Menter, T., Haslbauer, J. D., Nienhold, R., Savic, S., Hopfer, H., Deigendes, N., ... Tzankov, A. (2020). Postmortem examination of COVID-19 patients reveals diffuse alveolar damage with severe capillary congestion and variegated findings in lungs and other organs suggesting vascular dysfunction. *Histopathology*, *77*(2), 198–209. <https://doi.org/10.1111/his.14134>
11. Berhane, S., Tabor, A., Sahu, A., & Singh, A. (2020). Development of bullous lung disease in a patient with severe COVID-19 pneumonitis. *BMJ Case Reports*, *13*(10), 2–5. <https://doi.org/10.1136/bcr-2020-237455>
12. Balasopoulou, A., Kokkinos, P., Pagoulatos, D., Plotas, P., Makri, O. E., Georgakopoulos, C. D., ... Loukovaara, S. (2017). Symposium Recent advances and challenges in the management of retinoblastoma Globe - saving Treatments. *BMC Ophthalmology*, *17*(1), 1. <https://doi.org/10.4103/ijo.IJO>
13. Lacroix, M., Graïess, F., Monnier-Cholley, L., & Arrivé, L. (2020). SARS-CoV-2 pulmonary infection revealed by subcutaneous emphysema and pneumomediastinum. *Intensive Care Medicine*, *46*(8), 1620–1621. <https://doi.org/10.1007/s00134-020-06078-3>
14. Marza, A. M., Petrica, A., Buleu, F. N., & Mederle, O. A. (2021). Case report: Massive spontaneous pneumothorax—a rare form of presentation for severe COVID-19 pneumonia. *Medicina (Lithuania)*, *57*(2), 1–6. <https://doi.org/10.3390/medicina57020082>
15. Romano, N., Fischetti, A., & Melani, E. F. (2020). Pneumomediastinum Related to Covid-19 Pneumonia. *Journal of Cleaner Production*, *360*(6), e19–e20. <https://doi.org/10.1016/j.amjms.2020.06.003>



16. Castiglioni, M., Pelosi, G., Meroni, A., Tagliabue, M., Uslenghi, E., Salaris, D., & Incarbone, M. (2021). Surgical Resections of Superinfected Pneumatoceles in a COVID-19 Patient. *Annals of Thoracic Surgery*, *111*(1), e23–e25. <https://doi.org/10.1016/j.athoracsur.2020.06.008>
17. Abou-Arab, O., Huette, P., Berna, P., & Mahjoub, Y. (2020). Tracheal trauma after difficult airway management in morbidly obese patients with COVID-19. *British Journal of Anaesthesia*, *125*(1), e168–e170. <https://doi.org/10.1016/j.bja.2020.04.004>
18. Janssen, J., Kamps, M. J. A., Joosten, T. M. B., & Barten, D. G. (2021). Spontaneous pneumomediastinum in a male adult with COVID-19 pneumonia. *American Journal of Emergency Medicine*, *40*, 228.e3–228.e5. <https://doi.org/10.1016/j.ajem.2020.07.066>
19. Manna, S., Maron, S. Z., Cedillo, M. A., Voutsinas, N., Toussie, D., Finkelstein, M., ... Jacobi, A. (2020). Spontaneous subcutaneous emphysema and pneumomediastinum in non-intubated patients with COVID-19. *Clinical Imaging*, *67*(June), 207–213. <https://doi.org/10.1016/j.clinimag.2020.08.013>
20. Zhou, C., Gao, C., Xie, Y., & Xu, M. (2020). COVID-19 with spontaneous pneumomediastinum. *The Lancet Infectious Diseases*, *20*(4), 510. [https://doi.org/10.1016/S1473-3099\(20\)30156-0](https://doi.org/10.1016/S1473-3099(20)30156-0)
21. Shan, S., Guangming, L., Wei, L., & Xuedong, Y. (2020). Spontaneous pneumomediastinum, pneumothorax and subcutaneous emphysema in COVID-19: Case report and literature review. *Revista Do Instituto de Medicina Tropical de Sao Paulo*, *62*, 1–5. <https://doi.org/10.1590/S1678-9946202062076>
22. Xiang, C., Wu, G., & Saranathan., M. (2020). SARS-CoV-2 pneumonia with subcutaneous emphysema, mediastinal emphysema, and pneumothorax: A case report. *Medicine (United States)*, *99*(20), 9–11. <https://doi.org/10.1097/MD.00000000000020208>
23. Wang, W., Gao, R., Zheng, Y., & Jiang, L. (2020). COVID-19 with spontaneous pneumothorax, pneumomediastinum and subcutaneous emphysema. *Journal of Travel Medicine*, *27*(5), 1–2. <https://doi.org/10.1093/jtm/taaa062>
24. Wong, K., Kim, D. H., Iakovou, A., Khanijo, S., Tsegaye, A., Hahn, S., ... Zaidi, G. (2020). Pneumothorax in COVID-19 Acute Respiratory Distress Syndrome: Case Series. *Cureus*, *12*(11), 3–9. <https://doi.org/10.7759/cureus.11749>
25. López Vega, J. M., Parra Gordo, M. L., Diez Tascón, A., & Ossaba Vélez, S. (2020). Pneumomediastinum and spontaneous pneumothorax as an extrapulmonary complication of COVID-19 disease. *Emergency Radiology*, *27*(6), 727–730. <https://doi.org/10.1007/s10140-020-01806-0>
26. Li, S., Chau, E., Ghasem, W., Sohn, J., & Yaghmour, B. (2020). Air Should Not be There: A Case of Pneumomediastinum and Pneumopericardium in COVID-19. *Cureus*, *12*(11). <https://doi.org/10.7759/cureus.11696>
27. Zayet, S., Klopfenstein, T., Mezher, C., Gendrin, V., Conrozier, T., & Ben Abdallah, Y. (2020). Coronavirus disease 2019 with spontaneous pneumothorax, pneumomediastinum and subcutaneous emphysema, France. *New Microbes and New Infections*, *38*, 100785. <https://doi.org/10.1016/j.nmni.2020.100785>
28. Mallick, T., Dinesh, A., Engdahl, R., & Sabado, M. (2020). COVID-19 Complicated by Spontaneous Pneumothorax. *Cureus*, *12*(7), 1–6. <https://doi.org/10.7759/cureus.9104>
29. Salah, O., Faisal, M., Alshahwani, I., & Elhiday, A. (2020). Bilateral Hemopneumothorax in COVID-19. *Cureus*, *12*(9), 1–10. <https://doi.org/10.7759/cureus.10314>
30. Aiolfi, A., Biraghi, T., Montisci, A., Bonitta, G., Micheletto, G., Donatelli, F., ... Bona, D. (2020). Management of Persistent Pneumothorax With Thoracoscopy and Bleb Resection in COVID-19 Patients. *Annals of Thoracic Surgery*, *110*(5), e413–e415. <https://doi.org/10.1016/j.athoracsur.2020.04.011>

31. Sethi, S. M., Sabeen Ahmed, A., Hanif, S., Aqeel, M., & Zubairi, A. B. S. (2021). Subcutaneous Emphysema and Pneumomediastinum in patients with CoVID-19 disease; Case series from a tertiary care hospital in Pakistan. *Epidemiology and Infection*, (June 2020). <https://doi.org/10.1017/S095026882100011X>
32. Borghesi, A., Aggiusti, C., Farina, D., Maroldi, R., & Muiesan, M. L. (2020). COVID-19 pneumonia: Three thoracic complications in the same patient. *Diagnostics*, *10*(7), 2–6. <https://doi.org/10.3390/diagnostics10070498>
33. Nunna, K., & Braun, A. B. (2021). Development of a large spontaneous pneumothorax after recovery from mild COVID-19 infection. *BMJ Case Reports*, *14*(1). <https://doi.org/10.1136/bcr-2020-238863>
34. Ramezani, R., Jafari, F., Fahami, Y., Pakniyat, A., & Rad, M. G. (2021). A case report of pneumomediastinum and subcutaneous emphysema associated with pandemic COVID-19 in a 43-year-old man. *Clinical Imaging*, *76*(January), 74–76. <https://doi.org/10.1016/j.clinimag.2021.01.009>
35. Kolani, S., Houari, N., Haloua, M., Alaoui Lamrani, Y., Boubbou, M., Serraj, M., ... Alami, B. (2020). Spontaneous pneumomediastinum occurring in the SARS-COV-2 infection. *IDCases*, *21*, 4–7. <https://doi.org/10.1016/j.idcr.2020.e00806>
36. Flower, L., Carter, J. P. L., Rosales Lopez, J., & Henry, A. M. (2020). Tension pneumothorax in a patient with COVID-19. *BMJ Case Reports*, *13*(5), 1–4. <https://doi.org/10.1136/bcr-2020-235861>
37. Eperjesiova, B., Hart, E., Shokr, M., Sinha, P., & Ferguson, G. T. (2020). Spontaneous Pneumomediastinum/Pneumothorax in Patients With COVID-19. *Cureus*, *12*(7), 10–13. <https://doi.org/10.7759/cureus.8996>
38. Ruggeri, P., & Girbino, G. (2014). Fatal pneumomediastinum associated with use of noninvasive mechanical ventilation. *Respirology Case Reports*, *2*(4), 126–128. <https://doi.org/10.1002/rcr2.73>
39. Gillespie, M., Dincher, N., Fazio, P., Okorji, O., Finkle, J., & Can, A. (2020). Coronavirus disease 2019 (COVID-19) complicated by Spontaneous Pneumomediastinum and Pneumothorax. *Respiratory Medicine Case Reports*, *31*, 101232. <https://doi.org/10.1016/j.rmcr.2020.101232>
40. Rohailla, S., Ahmed, N., & Gough, K. (2020). SARS-CoV-2 infection associated with spontaneous pneumothorax. *Cmaj*, *192*(19), E510. <https://doi.org/10.1503/cmaj.200609>
41. Kim, W., & Kim, W. (2020). *v o i s r n o l a v o i s n o l a v o i n*, *52*(4), 4–7.
42. Shirai, T., Mitsumura, T., Aoyagi, K., Okamoto, T., Kimura, M., Gemma, T., ... Miyazaki, Y. (2020). COVID-19 pneumonia complicated by bilateral pneumothorax: A case report. *Respiratory Medicine Case Reports*, *31*, 101230. <https://doi.org/10.1016/j.rmcr.2020.101230>
43. Hameed, M., Jamal, W., Yousaf, M., Thomas, M., Haq, I. U., Ahmed, S., ... Khatib, M. (2020). Pneumothorax In Covid-19 Pneumonia: A case series. *Respiratory Medicine Case Reports*, *31*(October), 101265. <https://doi.org/10.1016/j.rmcr.2020.101265>
44. Spiro, J. E., Sisovic, S., Ockert, B., Böcker, W., & Siebenbürger, G. (2020). Secondary tension pneumothorax in a COVID-19 pneumonia patient: a case report. *Infection*, *48*(6), 941–944. <https://doi.org/10.1007/s15010-020-01457-w>
45. Gurkan, O., Yilmaz, A., Cengel, F., Altunok, E. S., & Ekin, E. E. (2020). COVID-19 pulmonary infection with pneumothorax in a young patient. *Journal of the College of Physicians and Surgeons Pakistan*, *30*(1), S43–S45. <https://doi.org/10.29271/jcpsp.2020.Supp1.S43>
46. Kim, J. S. (2001). Case report : Case report. *Canadian Family Physician*, *47*(10), 788–789.

47. Amador Penco, F. de B., Villalonga, D., Hermoso Martínez, J. I., & Smith Vielma, L. G. (2020). Massive subcutaneous emphysema in patient SARS-CoV-2 positive. *Revista Espanola de Anestesiologia y Reanimacion*, 67(9), 532–533. <https://doi.org/10.1016/j.redar.2020.06.011>
48. Toquica Gahona, C. C., Raj, K., Bhandari, K., Nuguru, S., & Bukhari, A. (2020). Subcutaneous Emphysema in Patients With COVID-19 Infection: A Report of Three Cases. *Cureus*, 12(9), 10–14. <https://doi.org/10.7759/cureus.10559>
49. González-Pacheco, H., Gopar-Nieto, R., Jiménez-Rodríguez, G. M., Manzur-Sandoval, D., Sandoval, J., & Arias-Mendoza, A. (2021). Bilateral spontaneous pneumothorax in SARS-CoV-2 infection: A very rare, life-threatening complication. *American Journal of Emergency Medicine*, 39, 258.e1-258.e3. <https://doi.org/10.1016/j.ajem.2020.07.018>
50. Wegner, U., Jeffery, G., Abrajan, O., Sampablo, I., & Singh, C. (2020). Spontaneous Pneumomediastinum Associated With SARS-CoV-2: Infrequent Complication of the Novel Disease. *Cureus*, 12(7). <https://doi.org/10.7759/cureus.9189>
51. Tucker, L., Patel, S., Vatsis, C., Poma, A., Ammar, A., Nasser, W., ... Carlan, S. (2020). Pneumothorax and Pneumomediastinum Secondary to COVID-19 Disease Unrelated to Mechanical Ventilation. *Case Reports in Critical Care*, 2020, 1–5. <https://doi.org/10.1155/2020/6655428>
52. Perice, L., Roit, Z., Llovera, I., & Flanagan-Kundle, M. (2020). Spontaneous Pneumothorax as a Complication of COVID-19 Pneumonia: A Case Report. *Clinical Practice and Cases in Emergency Medicine*, 4(4), 521–523. <https://doi.org/10.5811/cpcem.2020.8.49139>
53. Sonia, F., & Kumar, M. (2020). A Complication of Pneumothorax and Pneumomediastinum in a Non-Intubated Patient With COVID-19: A Case Report. *Cureus*, 12(8), 10–13. <https://doi.org/10.7759/cureus.10044>
54. Hussain, A., Noorani, A., Deshpande, R., John, L., Baghai, M., Wendler, O., ... Khan, H. (2020). Management of pneumothorax in mechanically ventilated COVID-19 patients: Early experience. *Interactive Cardiovascular and Thoracic Surgery*, 31(4), 540–543. <https://doi.org/10.1093/icvts/ivaa129>
55. Yamaya, T., Baba, T., Hagiwara, E., Ikeda, S., Niwa, T., Kitayama, T., ... Ogura, T. (2020). Pneumothorax in a COVID-19 pneumonia patient without underlying risk factors. *Internal Medicine*, 59(22), 2921–2925. <https://doi.org/10.2169/internalmedicine.5731-20>
56. Muhammad, A. I., Boynton, E. J., & Naureen, S. (2020). COVID-19 with bilateral pneumothoraces- case report. *Respiratory Medicine Case Reports*, 31, 101254. <https://doi.org/10.1016/j.rmcr.2020.101254>
57. Chen, X., Zhang, G., Tang, Y., Peng, Z., & Pan, H. (2020). The coronavirus diseases 2019 (COVID-19) pneumonia with spontaneous pneumothorax: A case report. *BMC Infectious Diseases*, 20(1), 1–5. <https://doi.org/10.1186/s12879-020-05384-x>
58. Selvaraj, V., & Dapaah-Afriyie, K. (2020). Iatrogenic Pneumothorax and Pneumomediastinum in a Patient with COVID-19. *Rhode Island Medical Journal (2013)*, 103(10), 32–33. <https://doi.org/10.1016/S1473-3099>
59. Umar Shahzad, M., Han, J., Ramtoola, M. I., Lamprou, V., & Gupta, U. (2021). Spontaneous Tension Pneumothorax as a Complication of COVID-19. *Case Reports in Medicine*, 2021. <https://doi.org/10.1155/2021/4126861>
60. Liu, K., Zeng, Y., Xie, P., Ye, X., Xu, G., Liu, J., ... Qian, J. (2020). COVID-19 with cystic features on computed tomography. *Medicine*, 99(18), e20175. <https://doi.org/10.1097/md.00000000000020175>
61. Sardenberg, R. A. S., Sant'Ana, J. P. E., Vicente, A. O., Pereira, A. S., Bertozzi, P. V., & Mano, R. B. C. (2020). Recurrent pneumothorax in a COVID-19 patient: A case report. *Respiratory Medicine Case Reports*, 31. <https://doi.org/10.1016/j.rmcr.2020.101201>

62. Fan, Q., Pan, F., & Yang, L. (2020). Spontaneous pneumothorax and subpleural bullae in a patient with COVID-19: A 92-day observation. *European Journal of Cardio-Thoracic Surgery*, 58(4), 858–860. <https://doi.org/10.1093/ejcts/ezaa305>
63. Alhakeem, A., Khan, M. M., Soub, H. Al, & Yousaf, Z. (2020). Case Report: COVID-19–Associated Bilateral Spontaneous Pneumothorax—A Literature Review. *American Journal of Tropical Medicine and Hygiene*, 103(3), 1162–1165. <https://doi.org/10.4269/ajtmh.20-0680>
64. Oye, M., Ali, A., Kandah, F., & Chowdhury, N. (2020). Two cases of spontaneous pneumomediastinum with pneumothorax in patients with COVID-19 associated pneumonia. *Respiratory Medicine Case Reports*, 31, 101308. <https://doi.org/10.1016/j.rmcr.2020.101308>
65. Pooni, R., Pandey, G., & Akbar, S. (2020). Broadening the differential: pneumomediastinum and COVID-19 infection. *BMJ Case Reports*, 13(8), 1–4. <https://doi.org/10.1136/bcr-2020-237938>
66. Silva, C. A. (1974). Clinical cases. *Ars Curandi Em Odontologia*, 1(5), 46–48.
67. Bellini, D., Lichtner, M., Vicini, S., Rengo, M., Ambrogi, C., & Carbone, I. (2020). Spontaneous pneumomediastinum as the only CT finding in an asymptomatic adolescent positive for COVID-19. *BJR/case Reports*, 6(3), 20200051. <https://doi.org/10.1259/bjrcr.20200051>
68. Janssen, M. L., van Manen, M. J. G., Cretier, S. E., & Braunstahl, G. J. (2020). Pneumothorax in patients with prior or current COVID-19 pneumonia. *Respiratory Medicine Case Reports*, 31, 101187. <https://doi.org/10.1016/j.rmcr.2020.101187>
69. Xu, Y., Li, S., & Liu, H. (2021). Clinical outcomes of pleural drainage on pneumothorax and hydrothorax in critically ill patients with COVID-19: A case series with literature review. *Heart and Lung*, 50(2), 213–219. <https://doi.org/10.1016/j.hrtlng.2020.12.007>
70. Polistina, G. E., Simioli, F., Imitazione, P., Lanza, M., Annunziata, A., & Fiorentino, G. (2020). Different presentation of pulmonary parenchymal disruption in COVID-19 pneumonia. Case series of Sub-Intensive Care Unit in Naples, Italy. *Monaldi Archives for Chest Disease*, 90(4), 572–576. <https://doi.org/10.4081/MONALDI.2020.1482>
71. Singh, A., Bass, J., & Lindner, D. H. (2020). Rare Complication of Pneumomediastinum and Pneumopericardium in a Patient with COVID-19 Pneumonia. *Case Reports in Pulmonology*, 2020. <https://doi.org/10.1155/2020/8845256>
72. Bassi, M., Anile, M., Pecoraro, Y., Ruberto, F., Martelli, S., Piazzolla, M., ... De Giacomo, T. (2020). Bedside Transcervical-Transtracheal Postintubation Injury Repair in a COVID-19 Patient. *Annals of Thoracic Surgery*, 110(5), e417–e419. <https://doi.org/10.1016/j.athoracsur.2020.04.009>
73. Akdogan, R. E., Mohammed, T., Syeda, A., Jiwa, N., Ibrahim, O., & Mutneja, R. (2021). Pneumothorax in Mechanically Ventilated Patients with COVID-19 Infection. *Case Reports in Critical Care*, 2021. <https://doi.org/10.1155/2021/6657533>
74. Deliwala, S. S., Ponnappalli, A., Seedahmed, E., Berrou, M., Bachuwa, G., & Chandran, A. (2020). A 29-year-old male with a fatal case of covid-19 acute respiratory distress syndrome (Cards) and ventilator-induced lung injury (vili). *American Journal of Case Reports*, 21, 1–6. <https://doi.org/10.12659/AJCR.926136>
75. Urigo, C., Soin, S., & Sahu, A. (2020). Spontaneous pneumomediastinum as a complication of a COVID-19 related pneumonia: case report and review of literature. *Radiology Case Reports*, 15(12), 2577–2581. <https://doi.org/10.1016/j.radcr.2020.09.052>
76. Khurram, R., Johnson, F. T. F., Naran, R., & Hare, S. (2020). Spontaneous tension pneumothorax and acute pulmonary emboli in a patient with COVID-19 infection. *BMJ Case Reports*, 13(8), 11–14. <https://doi.org/10.1136/bcr-2020-237475>

77. Aiolfi, A., Bruni, B., Biraghi, T., Montisci, A., Miceli, A., Baronio, B., ... Bona, D. (2020). Late histological findings in symptomatic COVID-19 patients: A case report. *Medicine*, 99(28), e21046. <https://doi.org/10.1097/MD.00000000000021046>
78. Horii, T., Fujioka, T., Takahashi, M., Mori, M., Tsuchiya, J., Yamaga, E., ... Tateishi, U. (2020). Late-onset pneumothorax in a COVID-19 patient treated with ventilation and ECMO: A case report and literature review. *Radiology Case Reports*, 15(12), 2560–2564. <https://doi.org/10.1016/j.radcr.2020.09.036>
79. Yasukawa, K., Vamadevan, A., & Rollins, R. (2020). Images in clinical tropical medicine bulla formation and tension pneumothorax in a patient with COVID-19. *American Journal of Tropical Medicine and Hygiene*, 103(3), 943–944. <https://doi.org/10.4269/ajtmh.20-0736>
80. Brogna, B., Bignardi, E., Salvatore, P., Alberigo, M., Brogna, C., Megliola, A., ... Musto, L. (2020). Unusual presentations of COVID-19 pneumonia on CT scans with spontaneous pneumomediastinum and loculated pneumothorax: A report of two cases and a review of the literature. *Heart and Lung*, 49(6), 864–868. <https://doi.org/10.1016/j.hrtlng.2020.06.005>
81. Rehman, T., Josephson, G., Sunbuli, M., & Chadaga, A. R. (2020). Spontaneous pneumothorax in an elderly patient with coronavirus disease (COVID-19) pneumonia. *Ochsner Journal*, 20(3), 343–345. <https://doi.org/10.31486/toj.20.0072>
82. Ezeagu, R., Olanipekun, T., Santoshi, R., Seneviratne, C., & Kupfer, Y. (2021). Pulmonary barotrauma resulting from mechanical ventilation in 2 patients with a diagnosis of covid-19 pneumonia. *American Journal of Case Reports*, 22(1), 1–7. <https://doi.org/10.12659/AJCR.927954>
83. Sardenberg, R. A. S., Sant'Ana, J. P. E., Vicente, A. O., Pereira, A. S., Bertozzi, P. V., & Mano, R. B. C. (2020). Recurrent pneumothorax in a COVID-19 patient: A case report. *Respiratory Medicine Case Reports*, 31. <https://doi.org/10.1016/j.rmcr.2020.101201>
84. Liu, Y., Wang, M., Luo, G., Qian, X., Wu, C., Zhang, Y., ... Tang, Y. (2020). Experience of N-acetylcysteine airway management in the successful treatment of one case of critical condition with COVID-19: A case report. *Medicine*, 99(42), e22577. <https://doi.org/10.1097/MD.00000000000022577>
85. Elder, C., Bawa, S., Anderson, D., Atkinson, S., Etzel, J., & Moritz, T. (2020). Expectant management of pneumothorax in intubated COVID-19 positive patients: A case series. *Journal of Cardiothoracic Surgery*, 15(1), 1–5. <https://doi.org/10.1186/s13019-020-01297-7>
86. Caviezel, C., Weiss, L., Haessig, G., Alfaré, C., Haberecker, M., Varga, Z., ... Opitz, I. (2020). Case report of sequential bilateral spontaneous pneumothorax in a never-ventilated, lung-healthy COVID-19-patient. *International Journal of Surgery Case Reports*, 75, 441–445. <https://doi.org/10.1016/j.ijscr.2020.09.148>
87. Abushahin, A., Degliuomini, J., Aronow, W. S., & Newman, T. G. (2020). A case of spontaneous pneumothorax 21 days after diagnosis of coronavirus disease 2019 (COVID-19) pneumonia. *American Journal of Case Reports*, 21, 1–4. <https://doi.org/10.12659/AJCR.925787>
88. Fleming, A. M., Zambetti, B. R., & Valaulikar, G. S. (2021). Bedside Mediastinotomy for Tension Pneumomediastinum with Tamponade in COVID-19. *The Annals of Thoracic Surgery*. <https://doi.org/10.1016/j.athoracsur.2021.01.032>
89. Lehmann-horn, K., Sagan, S. A., Bernard, C. C. A., Sobel, A., Zamvil, S. S., Wanna, A. G. B., ... Dawant, B. M. (2014). This article has been accepted for publication and undergone full peer review but has not been through the copyediting, typesetting, pagination and proofreading process which may lead to differences between this version and the Version of Record. Please c. *The Laryngoscope*, (August), 2–31.

90. Harper, S., Robinson, M., Manning, G., Jones, A., Hobson, J., & Shelton, C. L. (2020). Management of tracheostomy-related tracheomegaly in a patient with COVID-19 pneumonitis. *Anaesthesia Reports*, 8(2), 159–162. <https://doi.org/10.1002/anr3.12076>
91. Rafiee, M. J., Babaki Fard, F., Samimi, K., Rasti, H., & Pressacco, J. (2021). Spontaneous pneumothorax and pneumomediastinum as a rare complication of COVID-19 pneumonia: Report of 6 cases. *Radiology Case Reports*, 16(3), 687–692. <https://doi.org/10.1016/j.radcr.2021.01.011>
92. Vahidirad, A., Jangjoo, A., Ghelichli, M., Arian Nia, A., & Zandbaf, T. (2021). Tension pneumothorax in patient with COVID-19 infection. *Radiology Case Reports*, 16(2), 358–360. <https://doi.org/10.1016/j.radcr.2020.11.044>
93. Reddy, A., Engelhardt, K., & Jain, D. (2020). Air leak syndrome in two very preterm infants born to mothers with coronavirus disease 2019: An association or a coincidence? *AJP Reports*, 10(3), E266–E269. <https://doi.org/10.1055/s-0040-1715180>
94. Dennison, J., Carlson, S., Faehling, S., Lieb, M., & Mubarik, A. (2020). Case report: Spontaneous pneumothorax in resolved, uncomplicated COVID-19 Pneumonia-A literature review. *Respiratory Medicine Case Reports*, 31, 101291. <https://doi.org/10.1016/j.rmcr.2020.101291>
95. Sanchez-Nadales, A., Treminio-Quezada, M., Abad, H., Navarro-Motta, J., Contreras-Chavez, P., Kachru, A., & Chu, C. (2020). Critical Care Management for Novel 2019 SARS-CoV-2 and HCoV-NL63 Coinfection in a Young Immunocompromised Patient: A Chicago Experience. *Case Reports in Critical Care*, 2020(December 2019), 1–8. <https://doi.org/10.1155/2020/8877641>
96. Afrazi, A., Garcia-Rodriguez, S., Maloney, J. D., & Morgan, C. T. (2021). Cavitory lung lesions and pneumothorax in a healthy patient with active Coronavirus-19 (COVID-19) viral pneumonia. *Interactive Cardiovascular and Thoracic Surgery*, 32(1), 150–152. <https://doi.org/10.1093/icvts/ivaa238>
97. Amoah, K., Gunasekaran, K., Rahi, M. S., & Buscher, M. G. (2020). A case of secondary tension pneumothorax in COVID-19 pneumonia in a patient with no prior history of lung disease. *SAGE Open Medical Case Reports*, 8, 2050313X2096750. <https://doi.org/10.1177/2050313x20967504>
98. Fahad, A. M., Mohammad, A. A., Al-Khalidi, H. A., & Alshewered, A. S. (2020). Spontaneous pneumothorax as a complication in COVID-19 male patient: A case report. *Clinical Case Reports*, 8(12), 3116–3119. <https://doi.org/10.1002/ccr3.3378>
99. Capleton, P., Ricketts, W., Lau, K., Ellis, S., Sheaff, M., Giaslakitotis, K., ... Tchrakian, N. (2021). Pneumothorax and Pneumatocoele Formation in a Patient with COVID-19: a Case Report. *SN Comprehensive Clinical Medicine*, 3(1), 269–272. <https://doi.org/10.1007/s42399-020-00689-z>
100. Nakatsutsumi, K., Sekiya, K., Urushibata, N., Hosoi, M., Arai, H., Nagaoka, E., ... Otomo, Y. (2020). A successful case of extracorporeal membrane oxygenation treatment for intractable pneumothorax in a patient with COVID-19. *Acute Medicine & Surgery*, 7(1), 2–5. <https://doi.org/10.1002/ams2.612>
101. Placik, D. A., Taylor, W. L., & Wnuk, N. M. (2020). Bronchopleural fistula development in the setting of novel therapies for acute respiratory distress syndrome in SARS-CoV-2 pneumonia. *Radiology Case Reports*, 15(11), 2378–2381. <https://doi.org/10.1016/j.radcr.2020.09.026>
102. Gupta, V. K., Alkandari, B. M., Mohammed, W., Tobar, A. M., & Abdelmohsen, M. A. (2021). Ventilator associated lung injury in severe COVID-19 pneumonia patients – Case

- Reports: Ventilator associated lung injury in COVID-19. *European Journal of Radiology Open*, 8, 100310. <https://doi.org/10.1016/j.ejro.2020.100310>
103. Kaisy, M. A. Al. (2020). Chest drain insertion following pneumothorax due to CPR in a COVID – 19 patient. *Visual Journal of Emergency Medicine*, 21(June), 100862. <https://doi.org/10.1016/j.visj.2020.100862>
104. Vidrio Duarte, R., Vidrio Duarte, E., Gutierrez Ochoa, J., Gaviria Leiva, M. C., & Pimentel-Hayashi, J. A. (2021). Pneumoperitoneum in a COVID-19 Patient Due to the Macklin Effect. *Cureus*, 13(2), 8–11. <https://doi.org/10.7759/cureus.13200>
105. Vaikunth, S. S., Bykhovsky, M. R., Romfh, A. W., Haeffele, C. L., Rogers, I. S., Dong, E., ... Lui, G. K. (2021). A 40-Year-Old Man With Tricuspid Atresia, Status Post-Fontan, With Severe COVID-19 Pneumonia and Pneumothorax. *JACC: Case Reports*, 3(2), 187–191. <https://doi.org/10.1016/j.jaccas.2020.10.032>
106. Kasturi, S., Muthirevula, A., Chinthareddy, R. R., & Lingaraju, V. C. (2021). Delayed recurrent spontaneous pneumothorax post-recovery from COVID-19 infection. *Indian Journal of Thoracic and Cardiovascular Surgery*, 1–3. <https://doi.org/10.1007/s12055-021-01145-w>
107. Xu, W., Luo, X., Wang, H., Shen, C., Song, Y., Sun, T., & Chen, M. (2021). Pulmonary emphysema, bullae and pneumothorax in COVID-19 pneumonia. *Radiology Case Reports*, 0–9. <https://doi.org/10.1016/j.radcr.2021.01.055>
